# Supplementary material for: Dichotomous mechanistic behavior in Narasaka–Heck cyclizations: electron rich Pd-catalysts generate iminyl radicals
Source: Royal Society of Chemistry journal article supplement (doi:10.1039/c5sc04037j), 2015-12-01
Supplement: c5sc04037j1.pdf [file c5sc04037j1.pdf]

# Dichotomous Mechanistic Behavior in Narasaka-Heck Cyclizations: Electron Rich Pd-Catalysts Generate Iminyl Radicals

Nicholas J. Race, Adele Faulkner, Megan H. Shaw, and John F. Bower\*

*School of Chemistry, University of Bristol, Bristol, BS8 1TS, UK*

## Electronic Supplementary Information

### Table of Contents

|                                                                                    |    |
|------------------------------------------------------------------------------------|----|
| General Experimental Details .....                                                 | 2  |
| Experimental Procedures and Data .....                                             | 3  |
| Copies of <sup>1</sup> H and <sup>13</sup> C NMR spectra for novel compounds ..... | 15 |
| References .....                                                                   | 31 |

**General Experimental Details.** Starting materials sourced from commercial suppliers were used as received unless otherwise stated. Dry solvents, where necessary, were obtained by distillation using standard procedures or by passage through a column of anhydrous alumina using equipment from Anhydrous Engineering based on the Grubb's design. The removal of solvents *in vacuo* was achieved using both a Büchi rotary evaporator (bath temperatures up to 40 °C) at a pressure of either 15 mmHg (diaphragm pump) or 0.1 mmHg (oil pump), as appropriate, and a high vacuum line at r.t.. Reactions requiring anhydrous conditions were run under an atmosphere of dry nitrogen or argon; glassware, syringes and needles were either flame dried immediately prior to use or placed in an oven (200 °C) for at least 2 h and allowed to cool either in a desiccator or under an atmosphere of nitrogen or argon; liquid reagents, solutions or solvents were added *via* syringe through rubber septa; solid reagents were added *via* Schlenk type adapters. Commercially available Merck Kieselgel 60F<sub>254</sub> aluminium backed plates were used for TLC analysis. Visualization was achieved by either UV fluorescence or basic KMnO<sub>4</sub> solution and heat. Flash column chromatography (FCC) was performed using silica gel (Aldrich 40-63 µm, 230-400 mesh). The crude material was applied to the column as a solution in CH<sub>2</sub>Cl<sub>2</sub> or by pre-adsorption onto silica, as appropriate. Melting points were determined using a Reichert melting point table and temperature controller and are uncorrected. Infra-red spectra were recorded in the range 4000-600 cm<sup>-1</sup> on a Perkin Elmer Spectrum either as neat films or solids compressed onto a diamond window. NMR spectra were recorded using either a Varian 400 MHz or JOEL ECS 400 MHz spectrometer. Chemical shifts ( $\delta$ ) are quoted in parts per million (ppm), coupling constants ( $J$ ) are given in Hz to the nearest 0.5 Hz. Other abbreviations used are s (singlet), d (doublet), t (triplet), m (multiplet) and br. (broad). <sup>1</sup>H and <sup>13</sup>C NMR spectra were referenced to the appropriate residual solvent peak. Assignments of <sup>1</sup>H NMR and <sup>13</sup>C NMR signals were made, where possible, using COSY, DEPT, HMQC, HMBC and NOE experiments. Where mixtures of isomers (*e.g.* diastereomers and/or rotamers) have been characterized together, they are referred to as A and B. *Numbering systems for NMR signal assignments are specified on the structure and are not related to those used for the compound names.* Mass spectra were determined by the University of Bristol mass spectrometry service by either electron impact (EI<sup>+</sup>) or chemical ionization (CI<sup>+</sup>) using a Fisons VG Analytical Autospec spectrometer, or by electrospray ionization (ESI<sup>+</sup>) using a Brüker Daltonics Apex IV spectrometer.

## Experimental procedures and Data.

### Ligand effects on the cyclization of oxime esters 1a/b

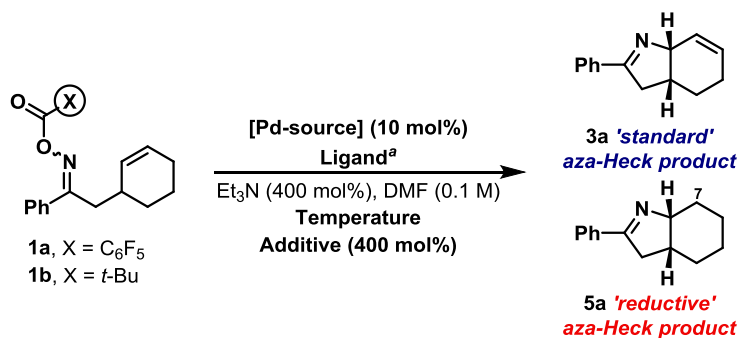

| Entry | X                             | Pd-source/Ligand                                                                                                                    | Temp/°C | Additive            | 3a (%) <sup>d</sup> | 5a (%) <sup>d</sup> |
|-------|-------------------------------|-------------------------------------------------------------------------------------------------------------------------------------|---------|---------------------|---------------------|---------------------|
| 1     | C <sub>6</sub> F <sub>5</sub> | Pd <sub>2</sub> (dba) <sub>3</sub> /PPh <sub>3</sub>                                                                                | 100     | none                | 30                  | <5                  |
| 2     | C <sub>6</sub> F <sub>5</sub> | Pd <sub>2</sub> (dba) <sub>3</sub> /P(2-furyl) <sub>3</sub>                                                                         | 100     | none                | 38                  | <5                  |
| 3     | C <sub>6</sub> F <sub>5</sub> | Pd <sub>2</sub> (dba) <sub>3</sub> /P(4-FC <sub>6</sub> H <sub>4</sub> ) <sub>3</sub>                                               | 100     | none                | 76                  | <5                  |
| 4     | C <sub>6</sub> F <sub>5</sub> | Pd <sub>2</sub> (dba) <sub>3</sub> /P(4-CF <sub>3</sub> C <sub>6</sub> H <sub>4</sub> ) <sub>3</sub>                                | 100     | none                | 85                  | <5                  |
| 5     | C <sub>6</sub> F <sub>5</sub> | Pd <sub>2</sub> (dba) <sub>3</sub> /P(3,5-(CF <sub>3</sub> ) <sub>2</sub> C <sub>6</sub> H <sub>3</sub> ) <sub>3</sub>              | 120     | none                | 90                  | <5                  |
| 6     | C <sub>6</sub> F <sub>5</sub> | Pd <sub>2</sub> (dba) <sub>3</sub> /P(3,5-(CF <sub>3</sub> ) <sub>2</sub> C <sub>6</sub> H <sub>3</sub> ) <sub>3</sub> <sup>c</sup> | 60      | none                | 93                  | <5                  |
| 7     | C <sub>6</sub> F <sub>5</sub> | Pd <sub>2</sub> (dba) <sub>3</sub> /P(C <sub>6</sub> F <sub>5</sub> ) <sub>3</sub>                                                  | 100     | none                | 10                  | <5                  |
| 8     | C <sub>6</sub> F <sub>5</sub> | ( <i>dt</i> -bpf)PdCl <sub>2</sub> <sup>b</sup>                                                                                     | 120     | none                | <5                  | 72                  |
| 9     | <i>t</i> -Bu                  | ( <i>dt</i> -bpf)PdCl <sub>2</sub> <sup>b</sup>                                                                                     | 120     | none                | <5                  | 72                  |
| 10    | <i>t</i> -Bu                  | Pd <sub>2</sub> (dba) <sub>3</sub> /S-Phos                                                                                          | 120     | none                | <5                  | 10                  |
| 11    | <i>t</i> -Bu                  | Pd <sub>2</sub> (dba) <sub>3</sub> /P(1-Ad) <sub>2</sub> <i>n</i> -Bu                                                               | 120     | none                | <5                  | 29                  |
| 12    | <i>t</i> -Bu                  | Pd <sub>2</sub> (dba) <sub>3</sub> /P(Cy) <sub>3</sub>                                                                              | 120     | none                | <5                  | 30                  |
| 13    | <i>t</i> -Bu                  | Pd <sub>2</sub> (dba) <sub>3</sub> /P( <i>t</i> -Bu) <sub>3</sub>                                                                   | 120     | none                | <5                  | 50                  |
| 14    | <i>t</i> -Bu                  | PEPPSI- <i>i</i> -Pr                                                                                                                | 120     | none                | <5                  | 27                  |
| 15    | <i>t</i> -Bu                  | ( <i>dt</i> -bpf)PdCl <sub>2</sub> <sup>b,c</sup>                                                                                   | 70      | none                | <5                  | 67                  |
| 16    | <i>t</i> -Bu                  | ( <i>dt</i> -bpf)PdCl <sub>2</sub> <sup>b,c</sup>                                                                                   | 70      | HCO <sub>2</sub> H  | <5                  | <5                  |
| 17    | <i>t</i> -Bu                  | ( <i>dt</i> -bpf)PdCl <sub>2</sub> <sup>b,c</sup>                                                                                   | 70      | <i>i</i> -PrOH      | <5                  | 61                  |
| 18    | <i>t</i> -Bu                  | ( <i>dt</i> -bpf)PdCl <sub>2</sub> <sup>b,c</sup>                                                                                   | 70      | 1,4-CHD             | <5                  | 80                  |
| 19    | <i>t</i> -Bu                  | ( <i>dt</i> -bpf)PdCl <sub>2</sub> <sup>b,c</sup>                                                                                   | 70      | $\gamma$ -terpinene | <5                  | 88                  |

<sup>a</sup> 1:2 [Pd]:ligand for monodentate systems, 1:1 [Pd]:ligand for bidentate systems.

<sup>b</sup> *dt*-bpf = 1,1'-bis(di-*tert*-butylphosphino)ferrocene. <sup>c</sup> 5 mol% Pd/L used. <sup>d</sup> Isolated yield.

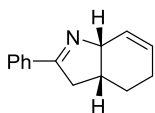

**(3aR\*,7aS\*)-2-Phenyl-3a,4,5,7a-tetrahydro-3H-indole 3a:** The optimized procedure for the cyclization of oxime ester **1a** to dihydropyrrole **3a** has been reported previously.<sup>1</sup>

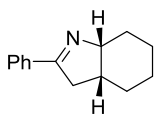

**(3aR\*,7aR\*)-2-Phenyl-3a,4,5,6,7,7a-hexahydro-3H-indole 5a:** An oven-dried reaction tube, fitted with magnetic stirrer, was charged with (*dt*-bpf)PdCl<sub>2</sub> (6.3 mg, 5 mol%) and oxime ester **1b** (58 mg,

0.19 mmol, 100 mol%). The tube was fitted with a rubber septum and purged with argon. DMF (1.90 mL, 0.1 M), Et<sub>3</sub>N (108 μL, 400 mol%) and γ-terpinene (124 μL, 400 mol%) were then added sequentially *via* syringe. The mixture was placed in a preheated heating block (70 °C) and stirred for 24 hours. The mixture was then cooled to room temperature and concentrated *in vacuo* (40 °C, approximately 1.0 mmHg). The residue was purified by FCC (4:1 hexane-EtOAc) to afford dihydropyrrole **5a** (34 mg, 88%) as a pale yellow oil. *The reaction proceeds with equal facility from oxime ester 1a.*  $\nu_{\max}$  / cm<sup>-1</sup> (film) 2928, 2853, 1604, 1574, 1448;  $\delta_{\text{H}}$  (400 MHz, CDCl<sub>3</sub>) 7.90-7.83 (2H, m), 7.46-7.39 (3H, m), 4.02-3.96 (1H, m), 2.90 (1H, dddd, *J* = 16.0, 9.0, 7.0 and 2.0 Hz), 2.74 (1H, dddd, *J* = 16.0, 11.5, 4.5, and 1.0 Hz), 2.46-2.36 (1H, m), 1.96-1.89 (2H, m), 1.67-1.59 (1H, m), 1.54-1.44 (3H, m), 1.37-1.26 (2H, m);  $\delta_{\text{C}}$  (100 MHz, CDCl<sub>3</sub>) 173.5, 135.4, 130.3, 128.5, 127.5, 70.1, 41.6, 37.0, 29.3, 27.5, 23.1, 22.2; HRMS (CI<sup>+</sup>) Found [M+H]<sup>+</sup>: 200.1434, C<sub>14</sub>H<sub>18</sub>N requires 200.1434.

*The relative stereochemistry of 5a was assigned by analogy to compounds 3a, 6 and 22b (vide infra).*

## TEMPO trapping experiments

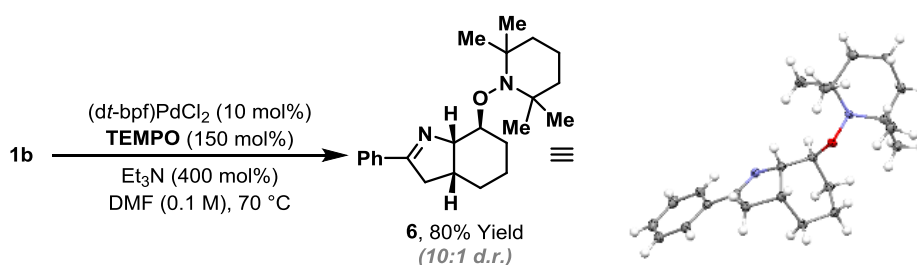

**(3aR\*,7S\*,7aS\*)-2-Phenyl-7-((2,2,6,6-tetramethylpiperidin-1-yl)oxy)-3a,4,5,6,7,7a-hexahydro-3H-indole 6:** An oven-dried reaction tube, fitted with magnetic stirrer, was charged with (dt-bpf)PdCl<sub>2</sub> (12.8 mg, 10 mol%), oxime ester **1b** (58 mg, 0.19 mmol, 100 mol%) and TEMPO (45 mg, 0.29 mmol, 150 mol%). The tube was fitted with a rubber septum and purged with argon. DMF (1.90 mL, 0.1 M) and Et<sub>3</sub>N (108 μL, 400 mol%) were then added sequentially *via* syringe. The mixture was placed in a preheated heating block (70 °C) and stirred for 24 hours. The mixture was then cooled to room temperature and concentrated *in vacuo* (40 °C, approximately 1.0 mmHg). The residue was purified by FCC (8:1 hexane-EtOAc) to afford dihydropyrrole **6** (54 mg, 80%, 10:1 d.r.) as a colorless, crystalline solid. Under these conditions, compound **5a** was not detected.  $\nu_{\max}$  / cm<sup>-1</sup> (film) 2935, 1604, 1571, 1447;  $\delta_{\text{H}}$  (400 MHz, CDCl<sub>3</sub>) 7.90-7.85 (2H, m), 7.45-7.35 (3H, m), 4.34-4.25 (1H, m), 4.21-4.15 (1H, m), 2.95 (1H, ddd, *J* = 16.0, 7.0, 2.0), 2.69 (1H, ddd, *J* = 16.0, 4.0, 1.0), 2.65-2.53 (1H, m), 1.84-1.73 (1H, m), 1.73-1.26 (11H, m), 1.23 (6H, s), 1.19 (6H, s);  $\delta_{\text{C}}$  (100 MHz, CDCl<sub>3</sub>) 173.5, 135.2, 130.4, 128.5, 127.7, 80.9, 73.7, 60.1, 42.1, 40.6, 36.1, 34.6, 27.8, 27.3 (2 signals), 20.6, 18.7, 17.4; HRMS (ESI<sup>+</sup>) Found [M+H]<sup>+</sup>: 355.2760, C<sub>23</sub>H<sub>35</sub>N<sub>2</sub>O requires 355.2744.

*The structure of the major diastereomer of this compound was confirmed by single crystal X-ray diffraction (see above) of crystals grown from CH<sub>2</sub>Cl<sub>2</sub>-hexane.*

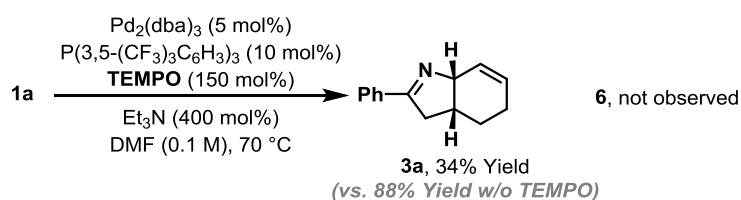

**(3aR\*,7aS\*)-2-Phenyl-3a,4,5,7a-tetrahydro-3H-indole 3a:** An oven-dried reaction tube, fitted with magnetic stirrer, was charged with  $\text{Pd}_2(\text{dba})_3$  (6.8 mg, 5 mol%),  $\text{P}(3,5\text{-(CF}_3)_2\text{C}_6\text{H}_3)_3$  (20.0 mg, 20 mol%), oxime ester **1a** (61 mg, 0.15 mmol, 100 mol%) and TEMPO (36 mg, 0.23 mmol, 150 mol%). The tube was fitted with a rubber septum and purged with argon. DMF (1.50 mL, 0.1 M) and  $\text{Et}_3\text{N}$  (84  $\mu\text{L}$ , 400 mol%) were then added sequentially *via* syringe. The mixture was placed in a preheated heating block (70 °C) and stirred for 22 hours. The mixture was then cooled to room temperature and concentrated *in vacuo* (40 °C, approximately 1.0 mmHg). The residue was purified by FCC (8:1 hexane-EtOAc) to afford dihydropyrrole **3a** (12 mg, 41%, >19:1 d.r.) as a colorless oil. Oxime ester **1a** was recovered in 34% yield. Compound **6** was not detected. *Spectroscopic data for dihydropyrrole 3a have been reported previously.*<sup>1</sup>

## Cyclopropane mechanistic experiments

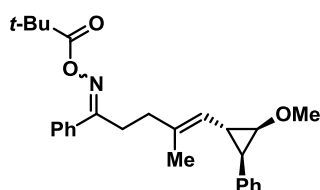

**(E)-5-(1S\*,2R\*,3R\*)-2-Methoxy-3-phenylcyclopropyl)-4-methyl-1-phenylpent-4-en-1-one O-pivaloyl oxime 7a:** This was synthesised according to our previously reported route.<sup>2</sup>

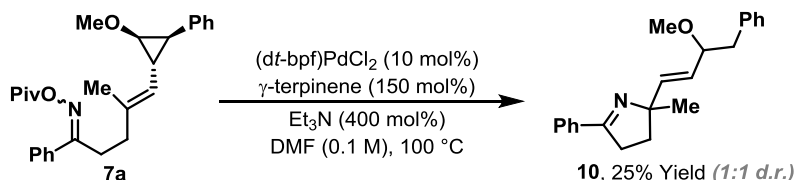

**(E)-2-(4-Methoxy-3-phenylbut-1-en-1-yl)-5-phenyl-3,4-dihydro-2H-pyrrole 10:** A flame-dried reaction tube, fitted with a magnetic stirrer bar, was charged with  $[\text{dt-bpf}]\text{PdCl}_2$  (15.6 mg, 10 mol%) and oxime ester **7a** (100 mg, 0.239 mmol). The tube was fitted with a rubber septum and purged with argon.  $\gamma\text{-Terpinene}$  (153  $\mu\text{L}$ , 0.955 mmol),  $\text{Et}_3\text{N}$  (133  $\mu\text{L}$ , 0.955 mmol) and argon-sparged DMF (2.4 mL) were added sequentially *via* syringe and the reaction mixture was heated at 90 °C. Upon consumption of starting material (TLC analysis, approximately 5 hours) the reaction mixture was cooled

to room temperature and concentrated *in vacuo* (approximately 0.1 mmHg). Purification of the residue by FCC (10:1 – 3:1 hexane-EtOAc) afforded the title compound **10** (19 mg, 25%, 1:1 d.r.) as a yellow oil.  $\nu_{\max}$  /  $\text{cm}^{-1}$  (film) 1722, 1612, 1575, 1495;  $\delta_{\text{H}}$  (400 MHz,  $\text{CDCl}_3$ ) 7.87-7.83 (2H, m), 7.44-7.38 (3H, m), 7.25-7.13 (5H, m), 5.74 (1H, dd,  $J = 16.0, 2.5$  Hz), 5.43-5.34 (1H, m), 3.79-3.73 (1H, m), 3.24 (3H, d,  $J = 2.0$  Hz), 3.05-2.69 (4H, m), 2.01-1.79 (2H, m), 1.40 (3H, app. d,  $J = 8.0$  Hz);  $\delta_{\text{C}}$  (100 MHz,  $\text{CDCl}_3$ ) 171.4, 140.1, 139.7, 138.4, 134.6, 130.4, 129.6, 128.4, 128.0, 127.7, 126.5, 126.0, 83.2, 83.1, 75.9, 56.3, 56.2, 42.3, 35.8, 35.7, 34.8, 27.5, 27.4; HRMS (ESI<sup>+</sup>) Found  $[\text{M}+\text{H}]^+$ : 320.2022,  $\text{C}_{22}\text{H}_{26}\text{NO}$  requires 320.2009.

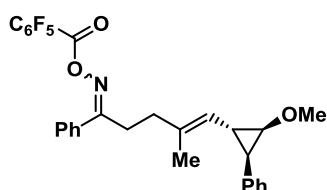

**(4E)-5-((1S\*,2R\*,3R\*)-2-Methoxy-3-phenylcyclopropyl)-4-methyl-1-phenylpent-4-en-1-one O-pentafluorobenzoyl oxime 7b:** To a solution of (4E)-5-((1S\*,2R\*,3R\*)-2-methoxy-3-phenylcyclopropyl)-4-methyl-1-phenylpent-4-en-1-one oxime<sup>2</sup> (1.37 g, 3.95 mmol) and  $\text{Et}_3\text{N}$  (1.38 mL, 7.90 mmol) in  $\text{CH}_2\text{Cl}_2$  (12 mL) at 0 °C was added pentafluorobenzoyl chloride (0.68 mL, 4.74 mmol) dropwise over 5 minutes. The mixture was then warmed to room temperature and stirred until the reaction was complete as observed by TLC. MeOH (1 mL) was then added and the mixture stirred for a further 10 minutes. The mixture was diluted with  $\text{CH}_2\text{Cl}_2$  (20 mL), washed with aq. 1 M HCl (15 mL), saturated aq.  $\text{Na}_2\text{CO}_3$  (15 mL), brine (15 mL), dried ( $\text{Na}_2\text{SO}_4$ ) and concentrated *in vacuo*. Purification of the residue by FCC (20:1 – 10:1 hexane-EtOAc) afforded the title compound **7b** (1.74 g, 83%, 12.5:1 mixture of oxime isomers) as a pale yellow oil.  $\nu_{\max}$  /  $\text{cm}^{-1}$  (film) 1764, 1649, 1523, 1494, 1321, 1189, 1000;  $\delta_{\text{H}}$  (400 MHz,  $\text{CDCl}_3$ ) 7.74-7.71 (1.80H, m), 7.51-7.41 (3H, m), 7.32-7.16 (5.2H, m), 4.79-4.73 (1H, m), 3.36 (0.08H, dd,  $J = 6.5, 3.5$  Hz), 3.33 (0.92H, m, dd,  $J = 6.5, 3.5$  Hz), 3.18 (0.24H, s), 3.17 (2.76H, s), 3.06-2.95 (1.84H, m), 2.89-2.85 (0.16H, m), 2.29-2.19 (2H, m), 2.01 (1H, ddd,  $J = 8.5, 6.5, 3.5$  Hz), 1.91 (1H, app. t,  $J = 6.5$  Hz), 1.73 (3H, s);  $\delta_{\text{C}}$  (100 MHz,  $\text{CDCl}_3$ ) Signals for the major isomer only: 168.5, 156.6, 137.1, 134.3, 133.2, 131.0, 128.8, 128.0, 127.7, 127.4, 125.7, 67.1, 58.2, 36.0, 32.3, 27.7, 26.5, 16.5; -136.9 (2F), -137.3 (0.16F), -147.4 (1F), -148.1 (0.08F), -159.8 (2F), -160.2 (0.16F); HRMS (ESI<sup>+</sup>) Found  $[\text{M}+\text{H}]^+$ : 530.1747,  $\text{C}_{29}\text{H}_{25}\text{F}_5\text{NO}_3$  requires 530.1749.

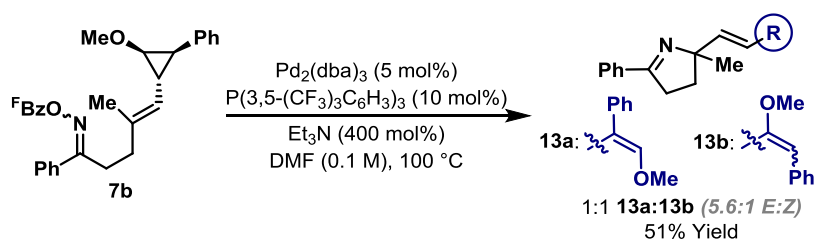

**2-((1*E*,3*E*)-4-Methoxy-3-phenylbuta-1,3-dien-1-yl)-2-methyl-5-phenyl-3,4-dihydro-2*H*-pyrrole 13a and 2-((1*E*)-3-Methoxy-4-phenylbuta-1,3-dien-1-yl)-2-methyl-5-phenyl-3,4-dihydro-2*H*-pyrrole 13b:** A flame-dried reaction tube, fitted with a magnetic stirrer bar, was charged with oxime ester **7b** (150 mg, 0.284 mmol), Pd<sub>2</sub>(dba)<sub>3</sub> (6.5 mg, 7.1 μmol) and P(3,5-(CF<sub>3</sub>)<sub>2</sub>C<sub>6</sub>H<sub>3</sub>)<sub>3</sub> (19 mg, 0.0284 mmol). The tube was fitted with a rubber septum and purged with argon. Et<sub>3</sub>N (158 μL, 1.13 mmol) and argon-sparged DMF (2.8 mL) were added sequentially *via* syringe and the reaction mixture was heated at 90 °C. Upon consumption of starting material (TLC analysis) the reaction mixture was cooled to room temperature and concentrated *in vacuo* (approximately 0.1 mmHg). Purification of the residue by FCC (50:1 – 30:1 toluene-EtOAc) afforded an inseparable mixture of the title compounds (46 mg, 51% yield, 1:1, **13a**:**13b**) as a yellow oil. **13b** was formed as a 5.6:1 mixture of *E*:*Z* alkene isomers. *Due to product instability, characterization was only possible by <sup>1</sup>H and <sup>13</sup>C NMR, and assignments were made by 2D NMR techniques (see pages S20-21).* δ<sub>H</sub> (400 MHz, CDCl<sub>3</sub>) 7.88-7.79 (2H, m), 7.44-7.10 (8H, m), 6.74 (0.50H, dd, *J* = 16.5, 1.0 Hz), 6.49 (0.43H, d, *J* = 15.5 Hz), 6.46 (0.43H, d, *J* = 15.5 Hz), 6.25 (0.07H, d, *J* = 15.5 Hz), 6.01 (0.07H, *J* = 15.5 Hz), 6.00 (0.5H, m), 5.82-5.74 (1H, m), 3.72 (1.27H, s), 3.69 (1.5H, s), 3.63 (0.21H, s), 3.08-2.86 (2H, m), 2.12-2.04 (1H, m), 1.93-1.86 (1H, m), 1.50 (0.21H, s), 1.46 (1.27H, s), 1.43 (1.5H, s); δ<sub>C</sub> (100 MHz, CDCl<sub>3</sub>) 171.6 (2C), 170.8 (3C), 155.5, 153.9, 146.6, 138.3, 138.1, 137.4, 136.8, 136.8, 135.7, 134.8, 134.6 (2C), 130.5, 130.4, 130.2, 129.5, 129.2, 128.6, 128.4, 128.3 (3C), 128.2, 128.1, 128.0, 127.8 (2C), 126.6, 126.5, 125.5, 123.3, 120.9, 119.9, 119.8, 116.3, 103.2, 76.8, 76.2, 76.2, 60.2, 58.5, 54.8, 36.2, 36.0, 35.9, 35.0 (2C), 34.9, 27.6, 27.5, 27.2.

The relative stereochemistry of (*E*)-**13b** and (*Z*)-**13b** was determined by *nOe* analysis, as indicated on the compound structures below.

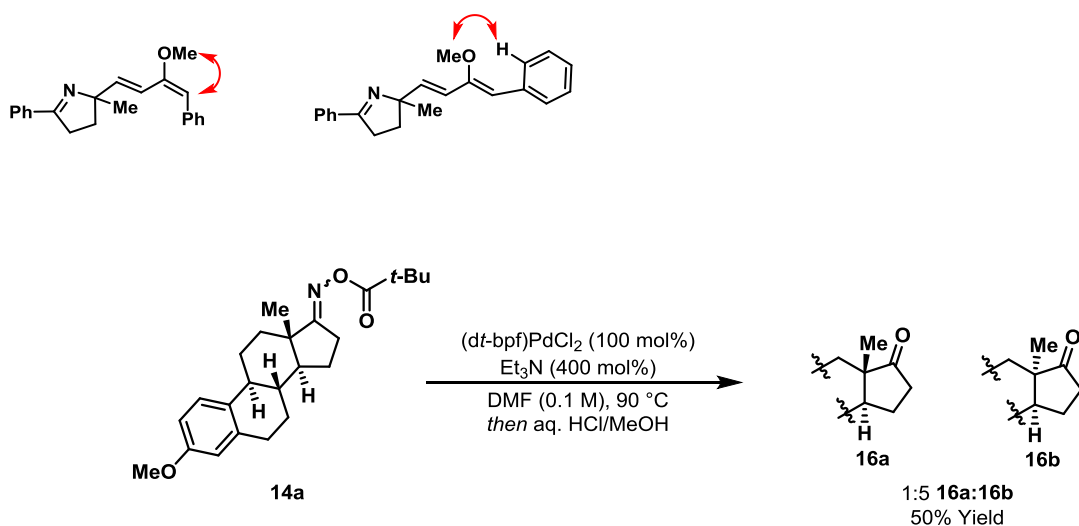

**Estrone-3-methylether 16a and 13a-estrone-3-methylether 16b:** An oven-dried reaction tube, fitted with magnetic stirrer, was charged with (dt-bpf)PdCl<sub>2</sub> (51 mg, 0.078 mmol) and oxime ester **14a**<sup>2</sup> (30 mg, 0.078 mmol). The tube was fitted with a rubber septum and purged with argon. Et<sub>3</sub>N (22 μL, 0.156 mmol) and DMF (0.8 mL) were then added sequentially *via* syringe. The mixture was then placed in a

preheated heating block (90 °C) and stirred for 18 hours. The mixture was then cooled to room temperature and concentrated *in vacuo* (40 °C, approximately 1.0 mmHg). The residue was re-dissolved in MeOH (4 mL) and 1 M HCl (2 mL) was added. The mixture was heated at 75 °C in a sealed tube for 2 hours. After cooling to room temperature the mixture was diluted with Et<sub>2</sub>O (10 mL) and washed with Na<sub>2</sub>CO<sub>3</sub> (10 mL), brine (10 mL), dried (Na<sub>2</sub>SO<sub>4</sub>), filtered and concentrated *in vacuo*. Purification of the residue (5:1 hexane-EtOAc) afforded the title compounds as an inseparable mixture (11 mg, 50% yield, 1:5, **16a:16b**). This material was contaminated with approx. 5% of an unidentified impurity.  $\delta_{\text{H}}$  (400 MHz, CDCl<sub>3</sub>) Diagnostic signals for **16a**: 0.91 (0.16H, s); Diagnostic signals for **16b**: 1.06 (0.84H, s);  $\delta_{\text{C}}$  (100 MHz, CDCl<sub>3</sub>) Diagnostic signals for **16a**: 21.6, 13.8; Diagnostic signals for **16b**: 21.0. *The spectroscopic properties of these compounds were consistent with the data previously reported in the literature.*<sup>3</sup> *The most diagnostic method for characterizing the mixture was <sup>13</sup>C NMR (shown below).*

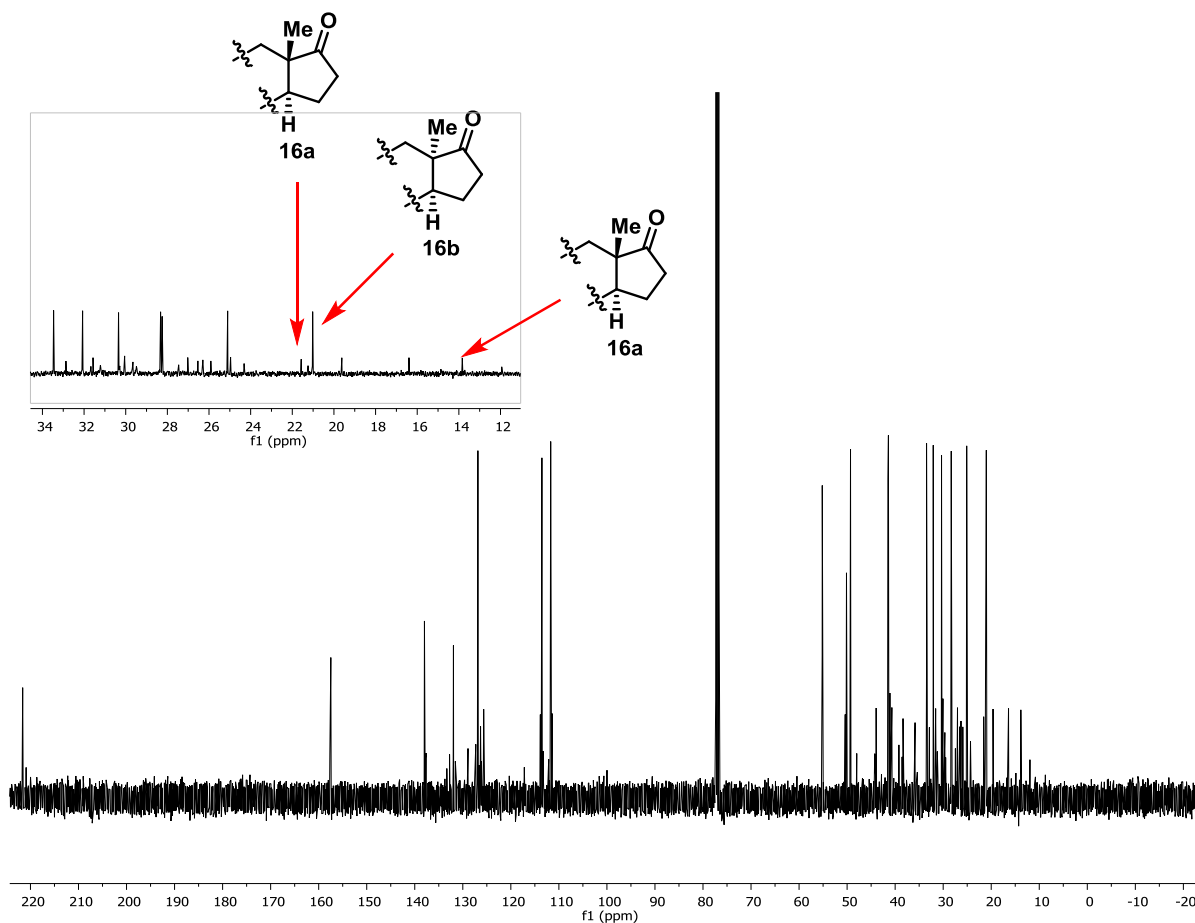



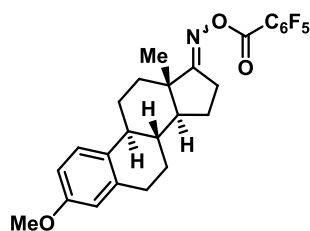

**Estrone 3-methyl ether O-pentafluorobenzoyl oxime 14b:** To a solution of estrone-3-methylether oxime<sup>2</sup> (500 mg, 1.67 mmol) and Et<sub>3</sub>N (0.58 mL, 3.34 mmol) in CH<sub>2</sub>Cl<sub>2</sub> (5 mL) at 0 °C was added pentafluorobenzoyl chloride (0.29 mL, 2.00 mmol) dropwise over 5 minutes. The mixture was then warmed to room temperature and stirred until the reaction was complete as observed by TLC. MeOH (1 mL) was then added and the mixture stirred for a further 10 minutes. The mixture was diluted with CH<sub>2</sub>Cl<sub>2</sub> (10 mL), washed with 1 M HCl (10 mL), saturated aq. Na<sub>2</sub>CO<sub>3</sub> (10 mL), brine (10 mL), dried (Na<sub>2</sub>SO<sub>4</sub>) and concentrated *in vacuo*. Purification of the residue by FCC (10:1 hexane-EtOAc) afforded the title compound **14b** (552 mg, 67%, >19:1 mixture of oxime isomers) as a colorless waxy solid.  $\nu_{\max}$  / cm<sup>-1</sup> (film) 1756, 1612, 1523, 1494, 1321, 1189, 1000;  $\delta_{\text{H}}$  (400 MHz, CDCl<sub>3</sub>) 7.22 (1H, dd, *J* = 8.5, 1.0 Hz), 6.73 (1H, dd, *J* = 8.5, 3.0 Hz), 6.64 (1H, d, *J* = 3.0 Hz), 3.78 (3H, s), 2.92-2.87 (2H, m), 2.80-2.60 (2H, m), 2.46-2.40 (1H, m), 2.35-2.23 (2H, m), 1.99-1.93 (2H, m), 1.80 (1H, td, *J* = 13.5, 4.0 Hz), 1.63-1.40 (5H, m), 1.08 (3H, s);  $\delta_{\text{C}}$  (100 MHz, CDCl<sub>3</sub>) 180.8, 157.6, 137.6, 131.9, 126.3, 113.9, 111.6, 55.2, 52.9, 46.0, 43.7, 38.2, 33.6, 29.6, 27.8, 27.2, 26.0, 22.8, 17.1;  $\delta_{\text{F}}$  (376 MHz, CDCl<sub>3</sub>) -137.0 (2F), -147.4 (1F), -159.7 (2F); HRMS (ESI<sup>+</sup>) Found [M+Na]<sup>+</sup>: 516.1555, C<sub>26</sub>H<sub>24</sub>F<sub>5</sub>NO<sub>3</sub>Na requires 516.1569.

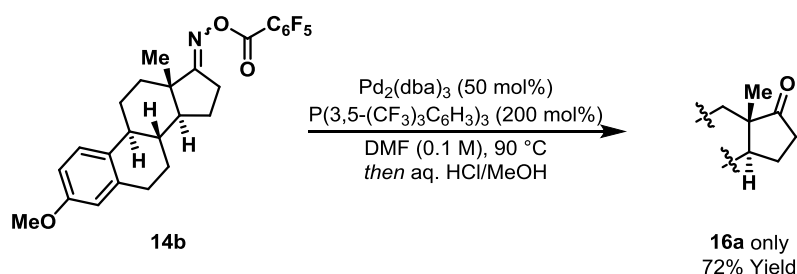

**Estrone-3-methylether 16a:** An oven-dried reaction tube, fitted with magnetic stirrer, was charged with Pd<sub>2</sub>(dba)<sub>3</sub> (42 mg, 0.046 mmol), P(3,5-(CF<sub>3</sub>)<sub>2</sub>C<sub>6</sub>H<sub>3</sub>)<sub>3</sub> (122 mg, 0.182 mmol) and oxime ester **14b** (45 mg, 0.091 mmol). The tube was fitted with a rubber septum and purged with argon. Anhydrous DMF (1 mL) was then added *via* syringe. The mixture was then placed in a preheated heating block (90 °C) until complete consumption of starting material was observed (TLC analysis). The mixture was then cooled to room temperature and concentrated *in vacuo* (40 °C, approximately 1.0 mmHg). The residue was redissolved in MeOH (4 mL) and 1 M HCl (2 mL) was added. The mixture was heated at 75 °C in a sealed tube for 2 hours. After cooling to room temperature, the mixture was diluted with Et<sub>2</sub>O (20 mL) and washed with NaHCO<sub>3</sub> (10 mL), brine (10 mL), dried (Na<sub>2</sub>SO<sub>4</sub>), filtered and concentrated *in vacuo*. Purification of the residue (10:1 – 5:1 hexane-EtOAc) afforded the title

compound **16a** (19 mg, 72%) as a colorless solid. The product was contaminated with approx. 2 mg of dibenzylideneacetone; the yield of **16a** has been adjusted accordingly.  $\delta_{\text{H}}$  (400 MHz,  $\text{CDCl}_3$ ) 7.21 (1H, d,  $J = 8.5$  Hz), 6.73 (1H, dd,  $J = 8.5, 3.0$  Hz), 6.65 (1H, d,  $J = 3.0$  Hz), 3.78 (3H, s), 2.94-2.88 (2H, m), 2.54-2.47 (1H, m), 2.43-2.38 (1H, m), 2.29-2.23 (1H, m), 2.19-1.94 (4H, m), 1.68-1.39 (6H, m), 0.91 (3H, s);  $\delta_{\text{C}}$  (100 MHz,  $\text{CDCl}_3$ ) 220.9, 157.4, 137.7, 132.0, 126.3, 113.9, 111.5, 55.2, 50.4, 48.0, 44.0, 38.4, 35.9, 31.6, 29.7, 26.5, 25.9, 21.6, 13.8. *The spectroscopic properties of this compound were consistent with the available in the literature.<sup>3</sup> **16b** was not observed in this reaction, see the  $^{13}\text{C}$  NMR spectrum below.*

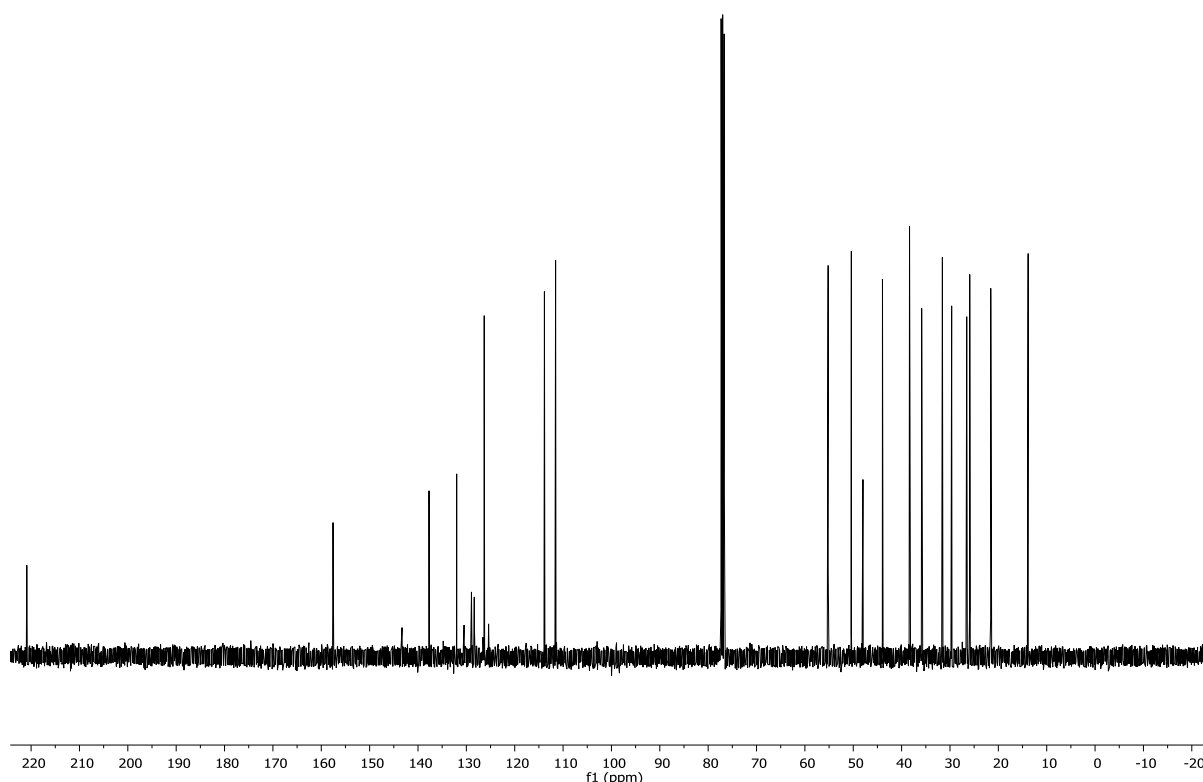

## Iminyl radical cyclization scope

**General Procedure A: for ‘reductive’ aza-Heck cyclizations:** An oven-dried reaction tube, fitted with magnetic stirrer, was charged with (*dt*-bpf)PdCl<sub>2</sub> (5 mol%) and oxime ester substrate (100 mol%). The tube was fitted with a rubber septum and purged with argon. DMF (0.1 M w.r.t oxime ester), Et<sub>3</sub>N (400 mol%) and  $\gamma$ -terpinene (400 mol%) were then added sequentially *via* syringe. The mixture was placed in a preheated heating block (70-95 °C as noted) and stirred for 20-24 hours (as noted). The mixture was then cooled to room temperature and concentrated *in vacuo* (40 °C, approximately 1.0 mmHg). The residue was purified by FCC, under the conditions noted, to afford the target dihydropyrrole.

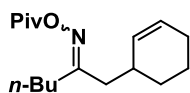

**1-(Cyclohex-2-en-1-yl)hexan-2-one O-pivaloyl oxime 21a:** To a room temperature solution of 1-(cyclohex-2-en-1-yl)hexan-2-one oxime (515 mg, 2.64 mmol)<sup>1</sup> in anhydrous CH<sub>2</sub>Cl<sub>2</sub> (7.80 mL) was added pivaloyl chloride (0.40 mL, 3.21 mmol) and Et<sub>3</sub>N (0.73 mL, 5.25 mmol). The mixture was stirred at room temperature for 22 hours. MeOH (5 mL) was added and the mixture was diluted with Et<sub>2</sub>O (50 mL). The mixture was washed with saturated aq. NaHCO<sub>3</sub> (2 × 25 mL), dried (Na<sub>2</sub>SO<sub>4</sub>) and concentrated *in vacuo*. Purification of the residue by FCC (6:1 hexane-EtOAc) afforded oxime ester **21a** (688 mg, 96%, 1:1 mixture of isomers) as a colorless oil.  $\nu_{\max}$  / cm<sup>-1</sup> (film) 2932, 1755, 1702, 1114;  $\delta_{\text{H}}$  (400 MHz, CDCl<sub>3</sub>) 5.77-5.70 (2H, m), 5.57 (1H, m), 5.50 (1H, m), 2.55-2.25 (10H, m), 2.03-1.95 (4H, m), 1.85-1.68 (4H, m), 1.63-1.45 (6H, m), 1.45-1.25 (6H, m), 1.29 (9H, s), 1.27 (9H, s), 0.97-0.90 (6H, m);  $\delta_{\text{C}}$  (100 MHz, CDCl<sub>3</sub>) 175.4, 175.3, 169.5, 169.3, 130.2, 130.1, 128.4, 128.3, 40.6, 38.8 (2 signals), 35.5, 34.5, 33.0, 32.6, 29.6, 29.3, 29.0, 28.8, 28.3, 27.4, 26.6, 25.2, 25.1, 23.1, 22.7, 21.2, 21.1, 13.9 (2 signals); HRMS (ESI<sup>+</sup>) Found [M+H]<sup>+</sup>: 280.2274, C<sub>17</sub>H<sub>30</sub>NO<sub>2</sub> requires 280.2271.

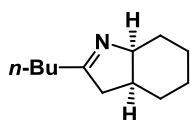

**(3aS\*,7aS\*)-2-Butyl-3a,4,5,6,7,7a-hexahydro-3H-indole 22a:** General procedure A: Oxime ester **21a** (50 mg, 0.18 mmol) was employed. The reaction was heated at 95 °C for 24 hours. FCC (2:1 to 1:1 hexane-EtOAc) afforded the title compound **22a** (15 mg, 47%) as a yellow oil.  $\nu_{\max}$  / cm<sup>-1</sup> (film) 2927, 1633, 1450, 1295;  $\delta_{\text{H}}$  (400 MHz, CDCl<sub>3</sub>) 3.75 (1H, m), 2.46 (1H, ddd, *J* = 17.0, 8.0, 2.0 Hz), 2.35 (2H, t, *J* = 8.0 Hz), 2.25-2.17 (2H, m), 1.89-1.73 (2H, m), 1.60-1.50 (2H, m), 1.50-1.09 (8H, m), 0.93 (3H, t, *J* = 7.5 Hz);  $\delta_{\text{C}}$  (100 MHz, CDCl<sub>3</sub>) 179.2, 69.0, 43.8, 36.9, 34.4, 29.0, 28.7, 27.6, 23.2, 22.8, 21.9, 14.0; HRMS (EI<sup>+</sup>) Found [M]<sup>+</sup>: 289.1838, C<sub>21</sub>H<sub>23</sub>N requires 289.1830. *N.B. Compound 22a is relatively volatile and appropriate care must be taken.*

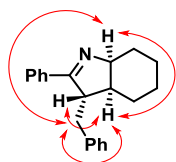

**(3S\*,3aS\*,7aS\*)-3-Benzyl-2-phenyl-3a,4,5,6,7,7a-hexahydro-3H-indole 22b:** General procedure A: Oxime ester **21b** (71 mg, 0.18 mmol)<sup>2</sup> was employed. The reaction was heated at 80 °C for 22 hours. FCC (5:1 hexane-EtOAc) afforded the title compound **22b** (38 mg, 73%, >19:1 d.r.) as a colorless oil.  $\nu_{\max}$  / cm<sup>-1</sup> (film) 2925, 1603, 1572, 1495, 1447;  $\delta_{\text{H}}$  (400 MHz, CDCl<sub>3</sub>) 7.97-7.90 (2H, m), 7.49-7.44 (3H, m), 7.35-7.30 (2H, m), 7.27-7.20 (3H, m), 4.05 (1H, m), 3.30 (1H, dd, *J* = 10.5, 4.0 Hz), 2.91 (1H, dd, *J* = 14.5, 4.0 Hz), 2.65 (1H, dd, *J* = 14.5, 11.0 Hz), 2.40 (1H, m), 2.11 (1H, dddd, *J* = 5.5, 5.5, 5.5, 4.0 Hz), 1.82-1.71 (1H, m), 1.60-1.47 (3H, m), 1.31 (1H, m), 1.15 (1H, m), 1.02 (1H, m);  $\delta_{\text{C}}$  (100 MHz,

CDCl<sub>3</sub>) 176.0, 140.5, 134.3, 130.4, 128.8, 128.7, 128.6, 128.0, 126.3, 67.7, 57.3, 41.1, 34.7, 29.1, 28.7, 24.0, 21.8. HRMS (EI<sup>+</sup>) Found [M]<sup>+</sup>: 289.1838, C<sub>21</sub>H<sub>23</sub>N requires 289.1830.

The relative stereochemistry of this compound was determined by *nOe* analysis, as indicated on the compound structure.

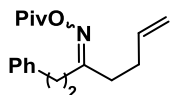

**1-Phenylhept-6-en-3-one O-pivaloyl oxime 21c:** To a solution of the corresponding oxime<sup>4</sup> (500 mg, 2.46 mmol) and pivaloyl chloride (593 mg, 4.92 mmol) in CH<sub>2</sub>Cl<sub>2</sub> (25 mL) was added triethylamine (1.13 mL, 8.12 mmol) at r.t.. After 20 hours the mixture was diluted with water (10 mL) and extracted with CH<sub>2</sub>Cl<sub>2</sub> (3 × 10 mL). The organic extracts were combined, dried (Na<sub>2</sub>SO<sub>4</sub>) and concentrated *in vacuo*. The residue purified by FCC (EtOAc-hexane 1:1) to afford **21c** (619 mg, 88 %, 1:1 d.r. A:B) as a colorless oil.  $\nu_{\max}$  / cm<sup>-1</sup> (film) 2933, 1754, 1107, 1027, 912, 699;  $\delta_{\text{H}}$  (400 MHz, CDCl<sub>3</sub>) 7.33-7.18 (5H, *A and B*), 5.87-5.74 (1H, *A and B*), 5.09-4.99 (2H, *A and B*), 2.95-2.91 (2H, m, *A*), 2.87-2.83 (2H, m, *B*), 2.68-2.63 (2H, m, *A and B*), 2.51-2.47 (2H, m, *A*), 2.41-2.26 (4H, m, *A and B*), 1.29 (9H, s, *A and B*);  $\delta_{\text{C}}$  (100 MHz, CDCl<sub>3</sub>) 175.2 (*A and B*), 168.9 (*A*), 168.7 (*B*), 140.9 (*A*), 140.3 (*B*), 136.9 (*A*), 136.6 (*B*), 128.8, 128.7, 128.4 and 128.3 (*A and B*), 126.7 (*A*), 126.4 (*B*), 116.1 (*A*), 115.8 (*B*), 38.9 (*A*), 38.8 (*B*), 36.6, 34.2, 32.5 and 32.2, (*A and B*), 31.9, 30.3, 30.2 and 29.5 (*A and B*), 27.4 (*A and B*); HRMS (ESI<sup>+</sup>) Found: [M+Na]<sup>+</sup> 310.1777, C<sub>18</sub>H<sub>25</sub>NO<sub>2</sub>Na requires 310.1783.

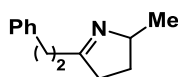

**2-Methyl-5-phenethyl-3,4-dihydro-2H-pyrrole 22c:** General procedure A: Oxime ester **21c** (53 mg, 0.18 mmol) was employed. The reaction was heated at 80 °C for 24 hours. FCC (EtOAc) afforded the title compound **22c** (19 mg, 58%) as a pale brown oil.  $\delta_{\text{H}}$  (400 MHz, CDCl<sub>3</sub>) 7.33-7.28 (2H, m), 7.26-7.19 (3H, m), 4.12-4.02 (1H, m), 3.02-2.88 (2H, m), 2.68-2.62 (2H, m), 2.55 (1H, dddd, *J* = 17.0, 10.0, 5.0, 2.0 Hz), 2.49-2.39 (1H, m), 2.14-2.05 (1H, m), 1.44-1.34 (1H, m), 1.27 (3H, d, *J* = 7.0 Hz);  $\delta_{\text{C}}$  (100 MHz, CDCl<sub>3</sub>) 176.3, 141.6, 128.5, 128.4, 126.1, 67.8, 37.9, 35.6, 32.9, 30.8, 22.2.

The spectroscopic properties of this compound were consistent with the data available in the literature.<sup>5</sup>

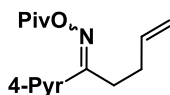

**1-(Pyridin-4-yl)pent-4-en-1-one O-pivaloyl oxime 21d:** In a re-sealable tube, 1-(pyridin-4-yl)pent-4-en-1-one<sup>6</sup> (499 mg, 3.10 mmol), NH<sub>2</sub>OH·HCl (253 mg, 3.64 mmol) and NaOAc (298 mg, 3.63 mmol) were suspended in MeOH (9.00 mL). The tube was sealed and the mixture was heated at 80 °C for 16 hours. The mixture was cooled to room temperature and concentrated *in vacuo*. The residue was dissolved in EtOAc (50 mL), washed with saturated aq. NaHCO<sub>3</sub> (50 mL) and brine (50 mL), dried

(Na<sub>2</sub>SO<sub>4</sub>) and concentrated *in vacuo* to afford the corresponding oxime (515 mg, 94%) as a pale yellow solid, which was used directly without purification. To a room temperature solution of the oxime (515 mg, 2.91 mmol)<sup>1</sup> in anhydrous CH<sub>2</sub>Cl<sub>2</sub> (9.00 mL) was added pivaloyl chloride (0.42 mL, 3.41 mmol) and Et<sub>3</sub>N (0.81 mL, 5.82 mmol). The mixture was stirred at room temperature for 22 hours. MeOH (5 mL) was added and the mixture was concentrated *in vacuo*. The residue was diluted with EtOAc (50 mL), and washed sequentially with water (50 mL), saturated aq. NaHCO<sub>3</sub> (2 × 25 mL) and brine (50 mL). The organic portion was dried (Na<sub>2</sub>SO<sub>4</sub>) and concentrated *in vacuo*. Purification of the residue by FCC (1:3 hexane-EtOAc) afforded oxime ester **21d** (696 mg, 92%, 10:1 mixture of isomers) as a pale yellow oil.  $\nu_{\max}$  / cm<sup>-1</sup> (film); 2978, 1699, 1482, 1197;  $\delta_{\text{H}}$  (400 MHz, CDCl<sub>3</sub>) *Signals for the major isomer*: 8.69-8.67 (2H, m), 7.62-7.60 (2H, m), 5.79 (1H, ddt, *J* = 17.0, 10.0, 6.5), 5.09-5.01 (2H, m), 2.94-2.89 (2H, m), 2.37-2.29 (2H, m), 1.33 (9H, s). *Characteristic signal for the minor isomer*: 2.77 (0.2H, t, *J* = 7.5);  $\delta_{\text{C}}$  (100 MHz, CDCl<sub>3</sub>) *Signals for the major isomer only*: 174.6, 164.0, 150.3, 141.6, 135.9, 121.3, 116.4, 38.8, 30.5, 27.4, 27.2; HRMS: (ESI<sup>+</sup>) Found [M+H]<sup>+</sup> 261.1599, C<sub>15</sub>H<sub>21</sub>N<sub>2</sub>O<sub>2</sub> requires 261.1598.

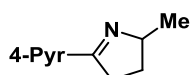

**4-(2-Methyl-3,4-dihydro-2H-pyrrol-5-yl)pyridine 22d**: General procedure A: Oxime ester **21d** (49 mg, 0.19 mmol) was employed. The reaction was heated at 90 °C for 24 hours. FCC (10:1 EtOAc-MeOH) afforded the title compound **22d** (25 mg, 82%) as a yellow oil.  $\nu_{\max}$  / cm<sup>-1</sup> (film) 2926, 1595, 1408;  $\delta_{\text{H}}$  (400 MHz, CDCl<sub>3</sub>) 8.66 (2H, d, *J* = 5.5), 7.66-7.65 (2H, m), 4.36-4.26 (1H, m), 3.02 (1H, dddd, *J* = 17.0, 10.0, 5.0, 2.5), 2.86 (1H, dddd, *J* = 17.0, 10.0, 7.5, 2.5), 2.27 (1H, dddd, *J* = 12.5, 10.0, 7.5, 5.0), 1.58 (1H, dddd, *J* = 12.5, 10.0, 7.5, 6.5), 1.36 (3H, d, *J* = 7.0);  $\delta_{\text{C}}$  (100 MHz, CDCl<sub>3</sub>) 170.3, 150.2, 141.6, 121.7, 69.0, 35.0, 30.5, 21.9; HRMS: (CI<sup>+</sup>) Found [M+H]<sup>+</sup> 161.1077, C<sub>10</sub>H<sub>13</sub>N<sub>2</sub> requires 161.1079.

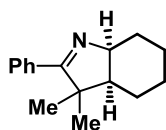

**(3a*S*\*,7a*S*\*)-3,3-Dimethyl-2-phenyl-3a,4,5,6,7,7a-hexahydro-3H-indole 22e**: General procedure A: Oxime ester **21e** (60 mg, 0.18 mmol)<sup>2</sup> was employed. The reaction was heated at 90 °C for 21 hours. FCC (4:1 hexane-EtOAc) afforded the title compound **22e** (29 mg, 71%) as a colorless oil.  $\nu_{\max}$  / cm<sup>-1</sup> (film) 2927, 1597, 1445, 1299;  $\delta_{\text{H}}$  (400 MHz, CDCl<sub>3</sub>) 7.55 (2H, m), 7.31-7.25 (3H, m), 4.01 (1H, ddd, *J* = 5.5, 5.5, 4.0), 2.17 (1H, dddd, *J* = 14.0, 4.0, 4.0, 4.0), 1.82 (1H, m), 1.73 (1H, m), 1.55-1.44 (3H, m), 1.35-1.25 (1H, m), 1.25 (3H, s), 1.15-1.07 (5H, m);  $\delta_{\text{C}}$  (125 MHz, CDCl<sub>3</sub>) 180.4, 135.9, 129.1, 128.0, 127.5, 65.9, 53.4, 49.7, 29.4, 24.3, 24.2, 24.0, 22.2, 21.2; HRMS: (ESI<sup>+</sup>) Found [M+H]<sup>+</sup> 228.1751, C<sub>16</sub>H<sub>22</sub>N requires 228.1747.

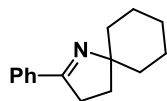

**2-Phenyl-1-azaspiro[4.5]dec-1-ene 22f:** General procedure A: Oxime ester **21f** (60 mg, 0.19 mmol)<sup>2</sup> was employed. The reaction was heated at 70 °C for 24 hours. FCC (12:1 hexane-EtOAc) afforded the title compound **22f** (32 mg, 80%) as a pale brown oil.  $\nu_{\max}$  /  $\text{cm}^{-1}$  (film) 2926, 2853, 1616, 1447, 1335;  $\delta_{\text{H}}$  (400 MHz,  $\text{CDCl}_3$ ) 7.84 (2H, m), 7.41-7.38 (3H, m), 2.98 (2H, t,  $J = 8.0$ ), 1.86 (2H, t,  $J = 8.0$ ), 1.79 (4H, m), 1.50-1.38 (5H, m), 1.65 (1H, m);  $\delta_{\text{C}}$  (100 MHz,  $\text{CDCl}_3$ ) 169.5, 135.2, 130.2, 128.4, 127.8, 76.9, 37.8, 34.5, 32.8, 25.9, 23.7; HRMS: ( $\text{CI}^+$ ) Found  $[\text{M}+\text{H}]^+$  214.1588,  $\text{C}_{15}\text{H}_{19}\text{N}$  requires 214.1596.

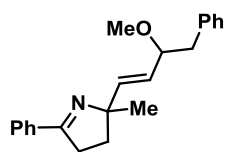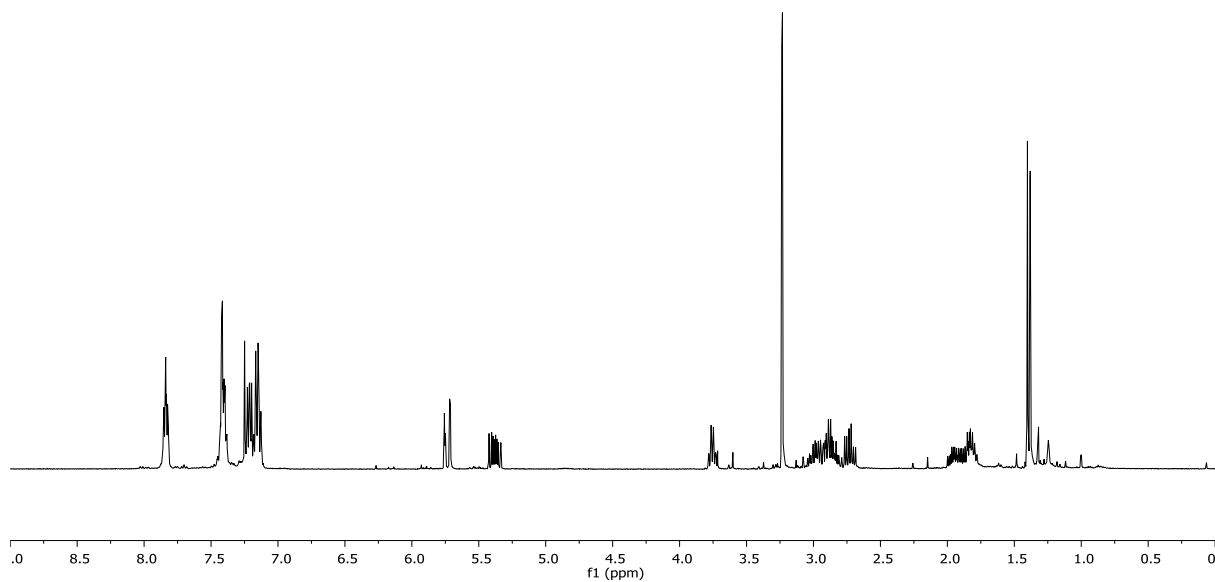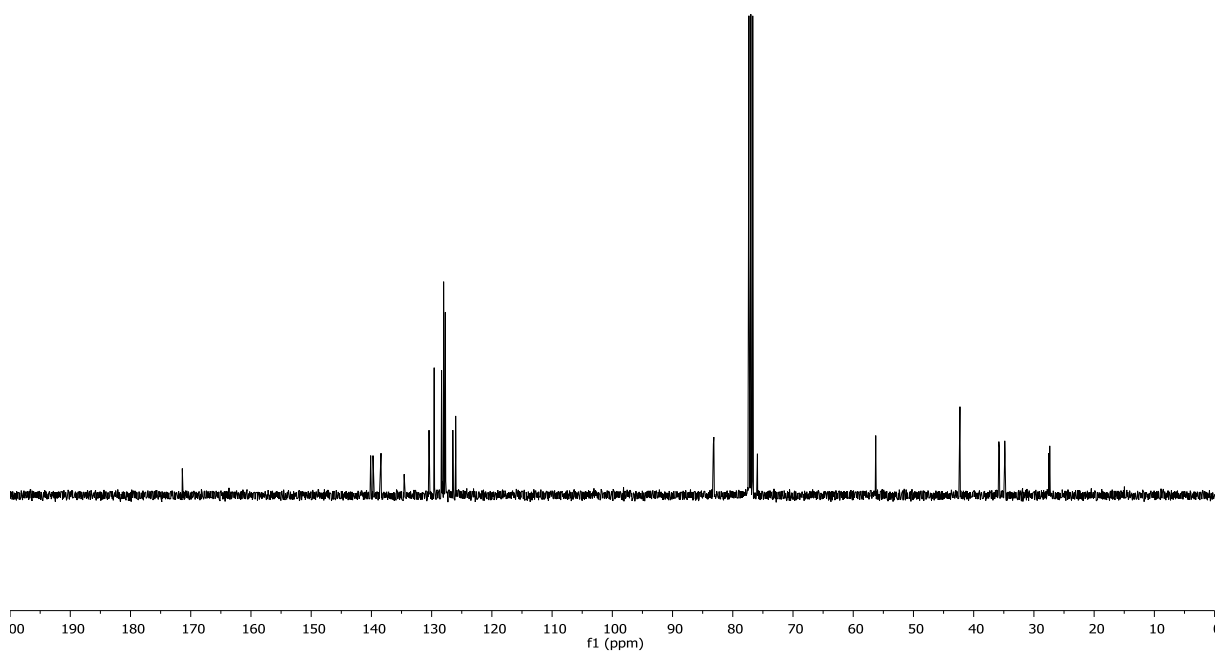

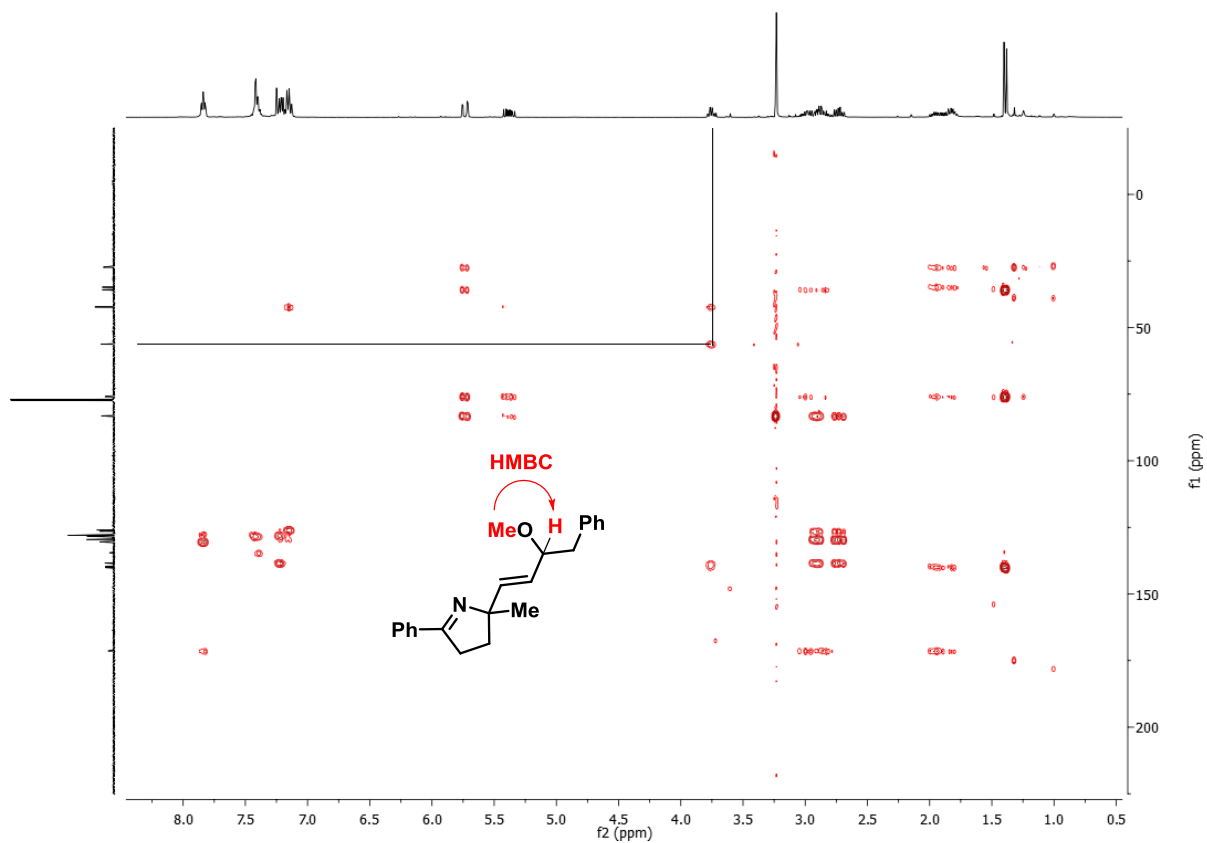



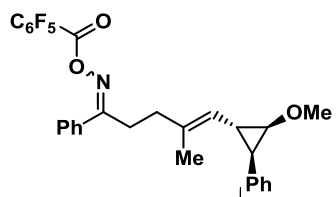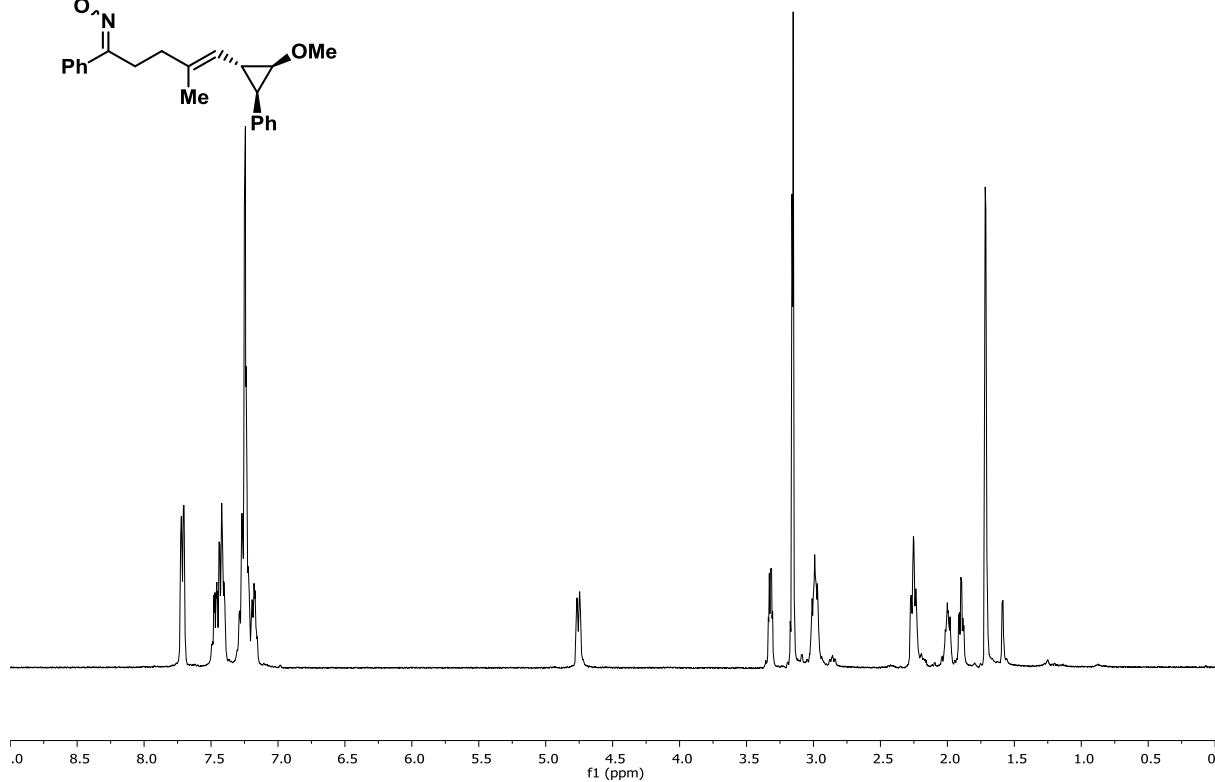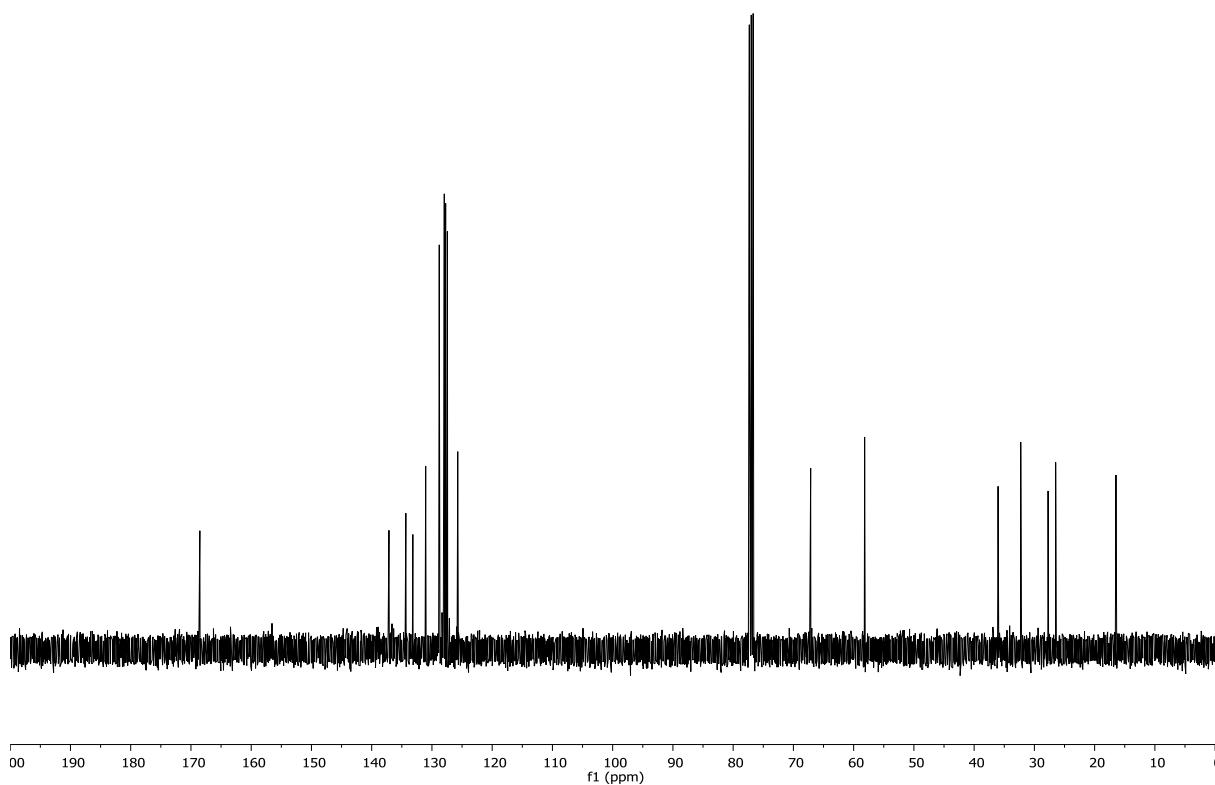

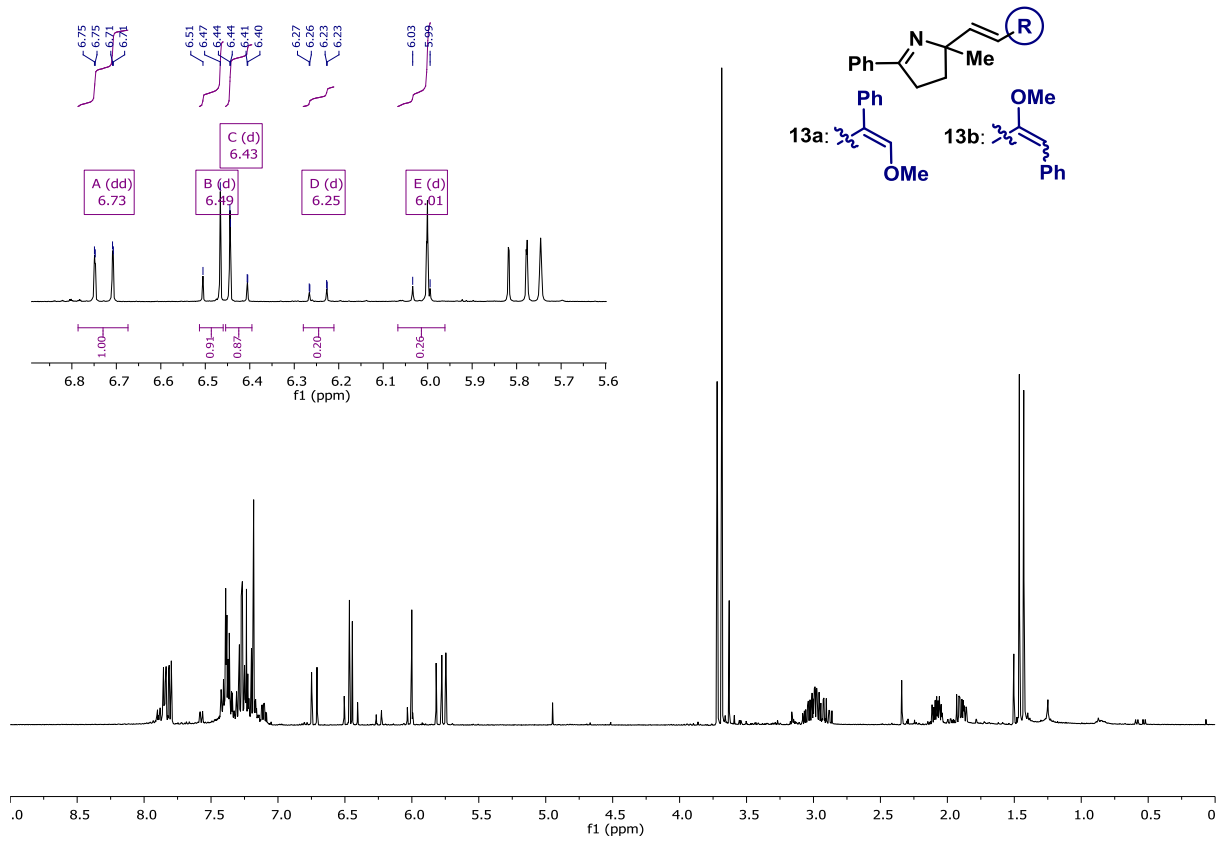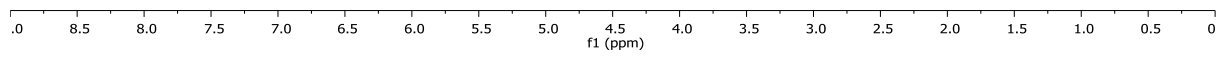

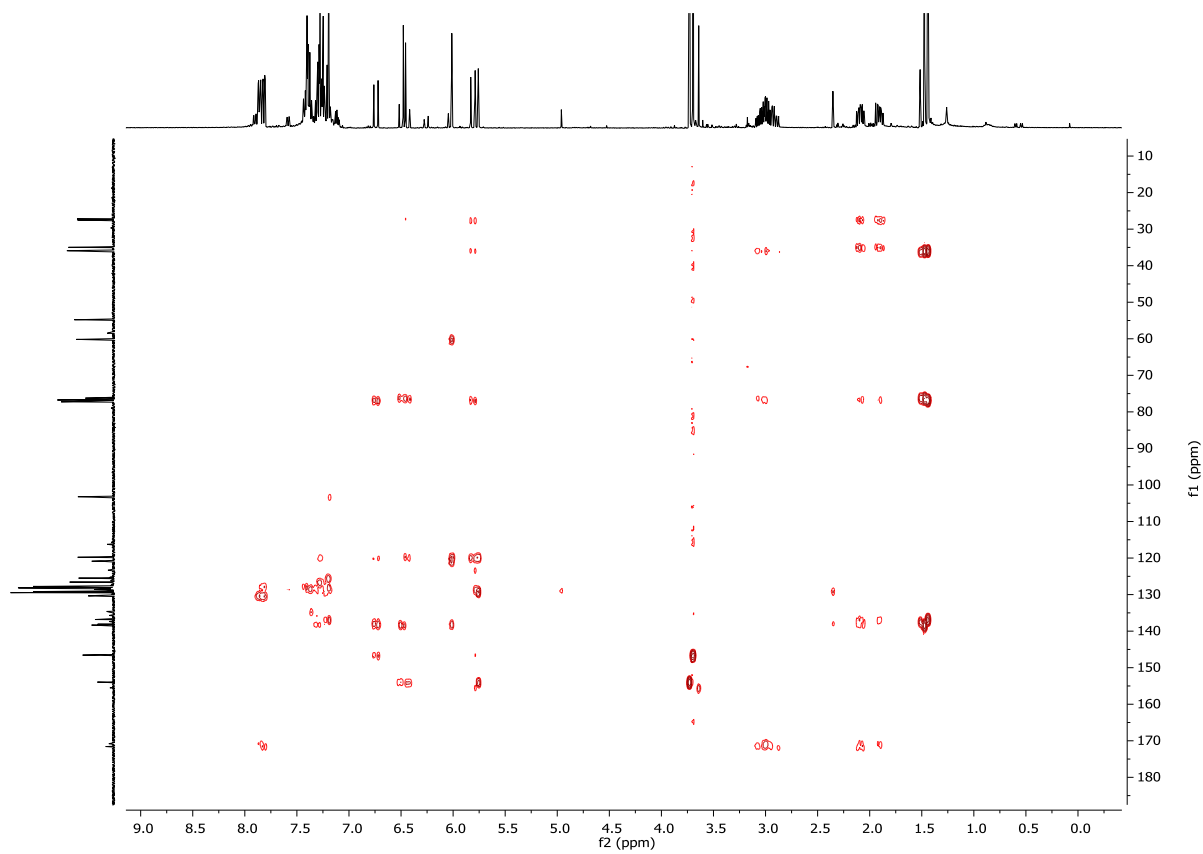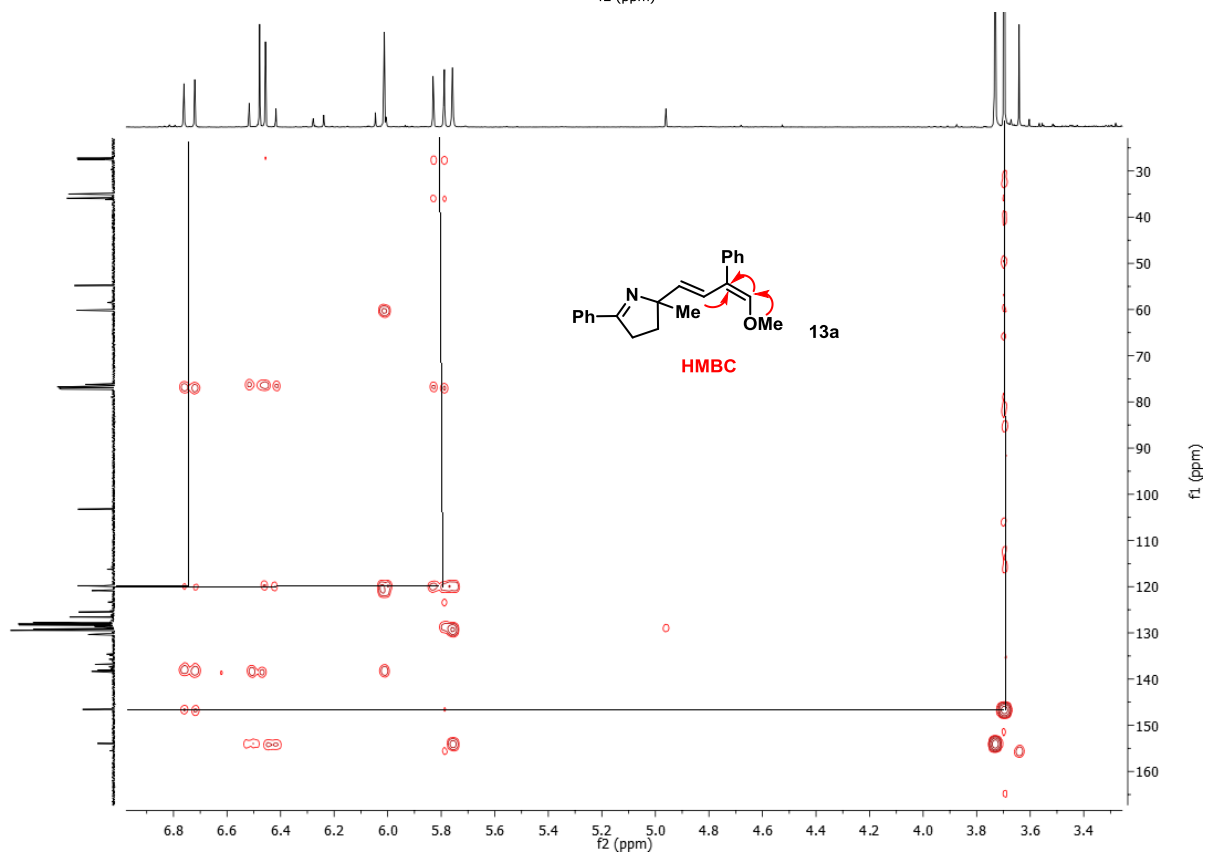

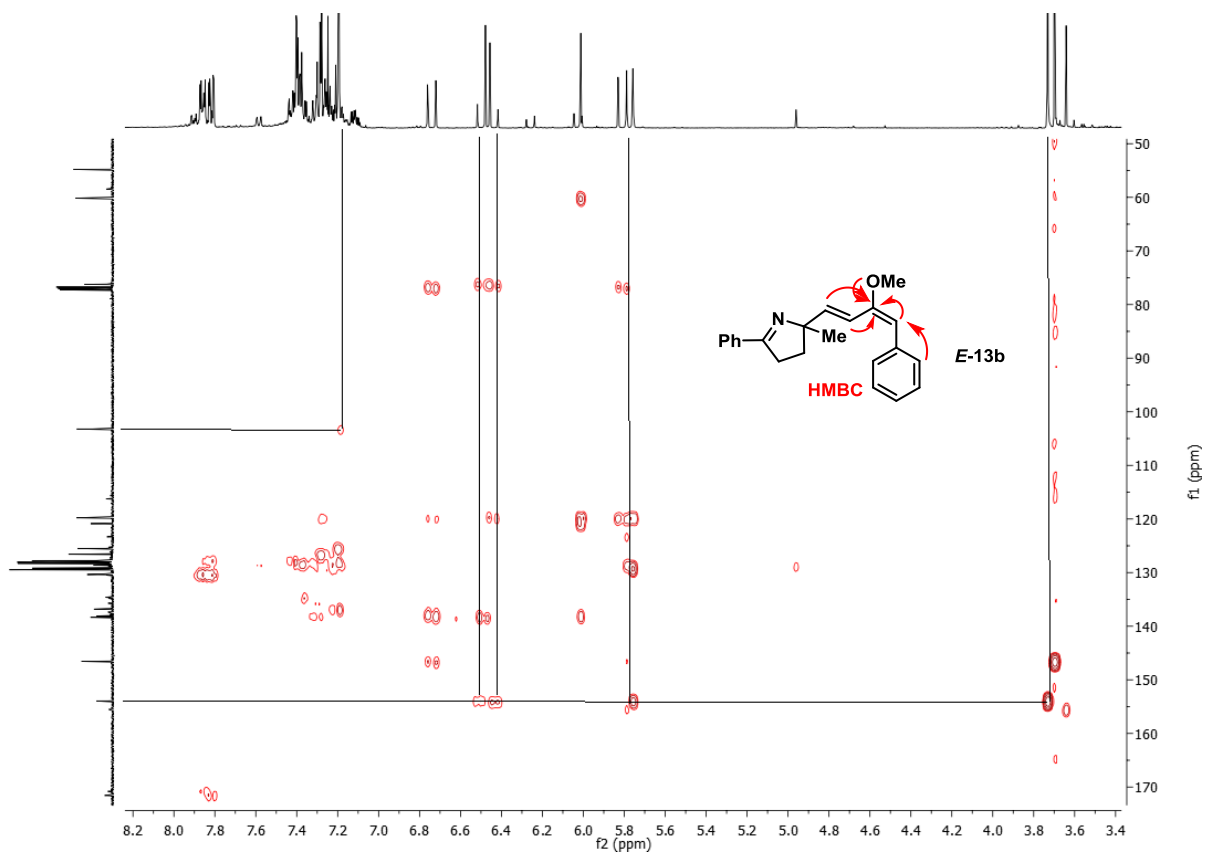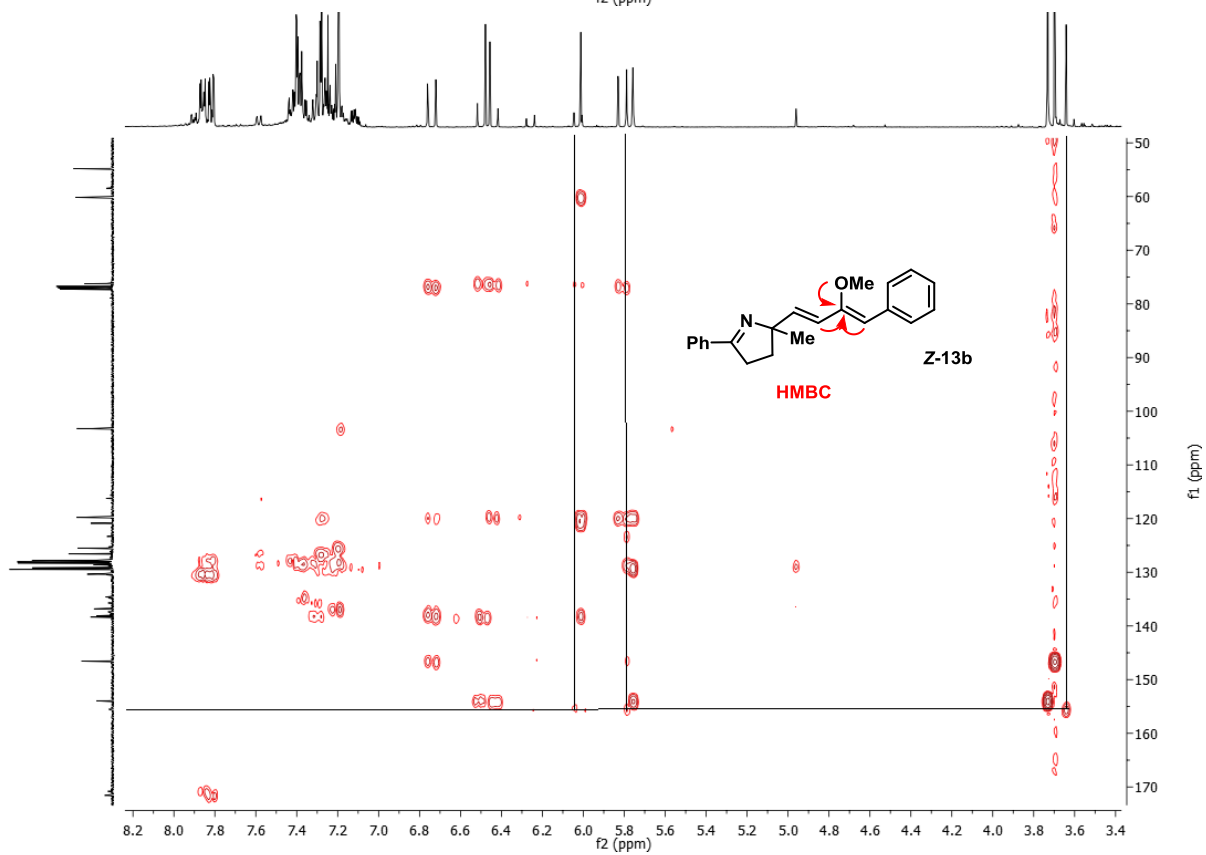

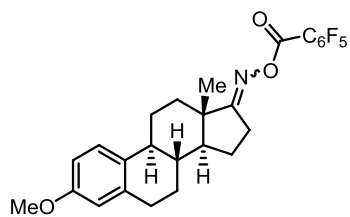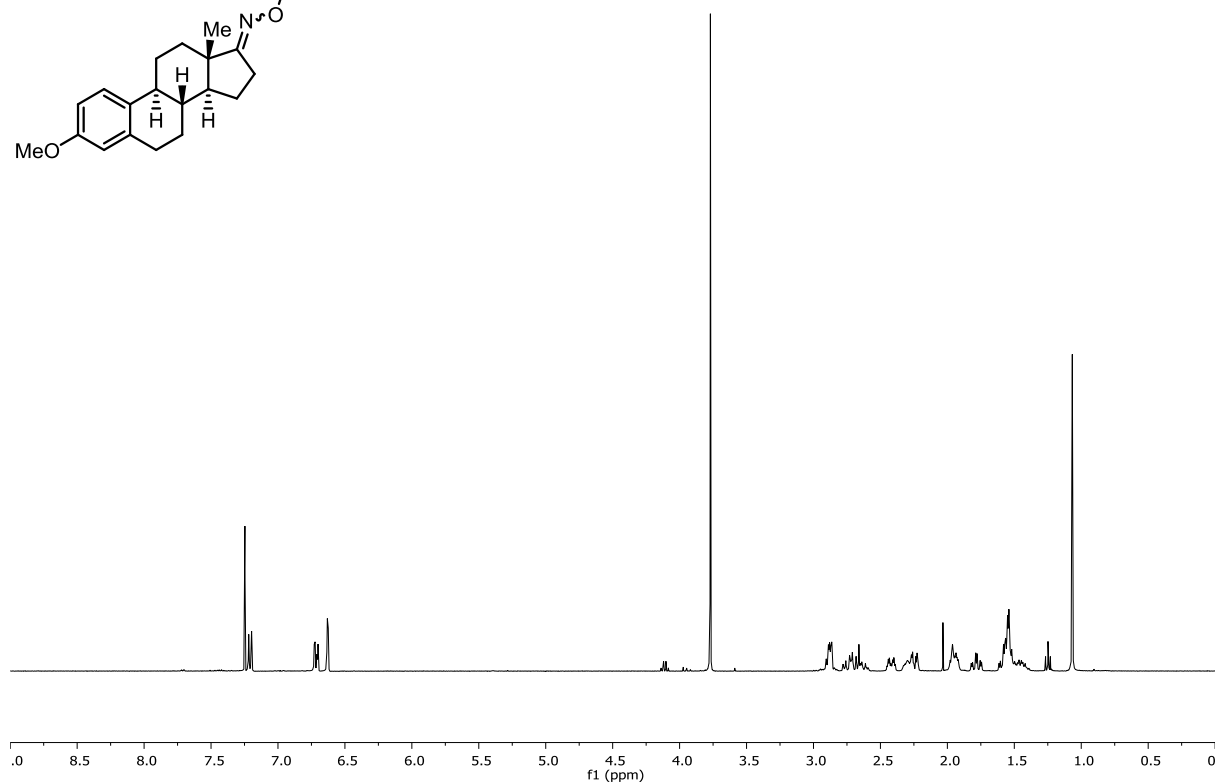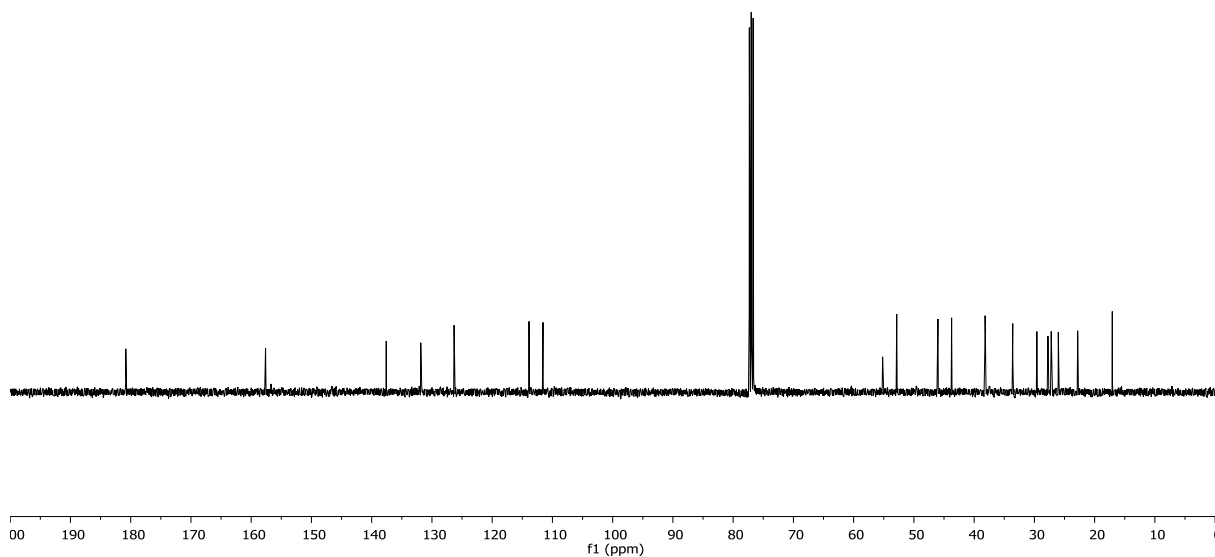

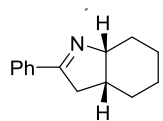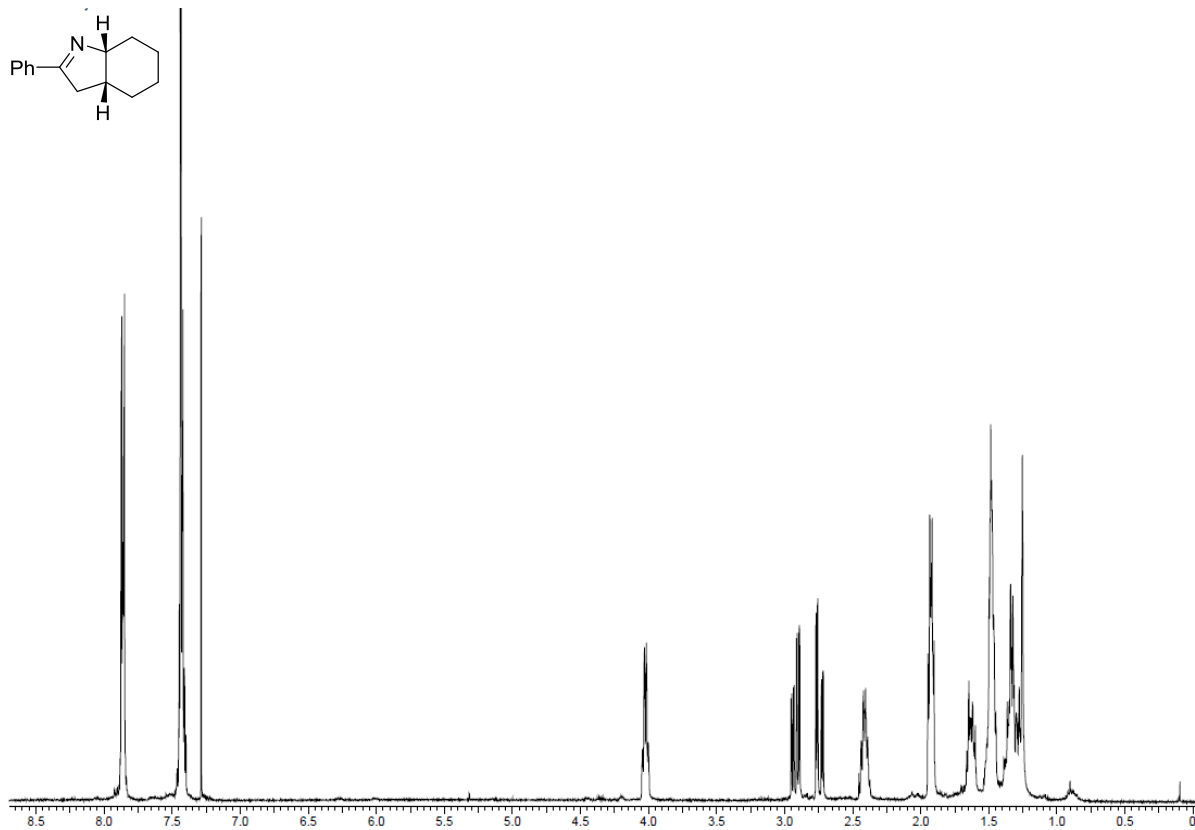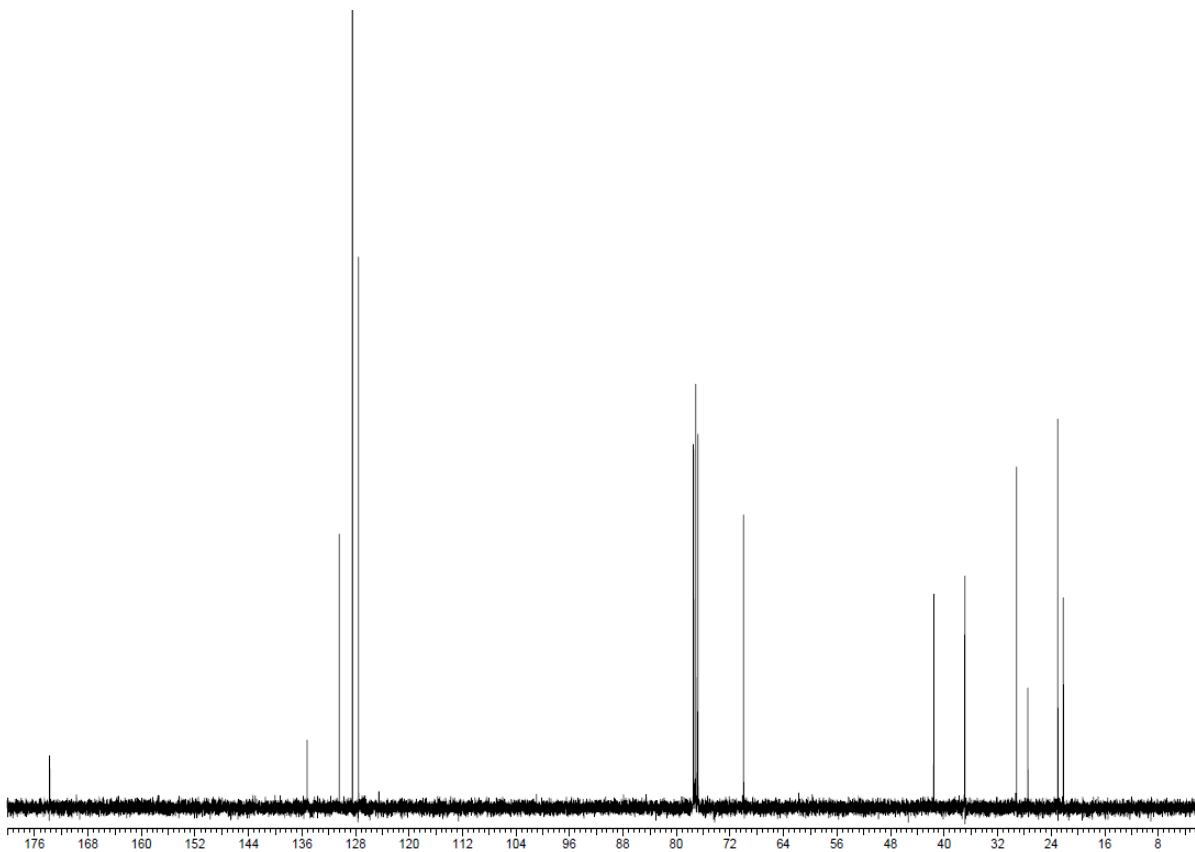

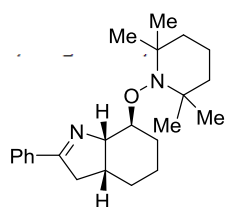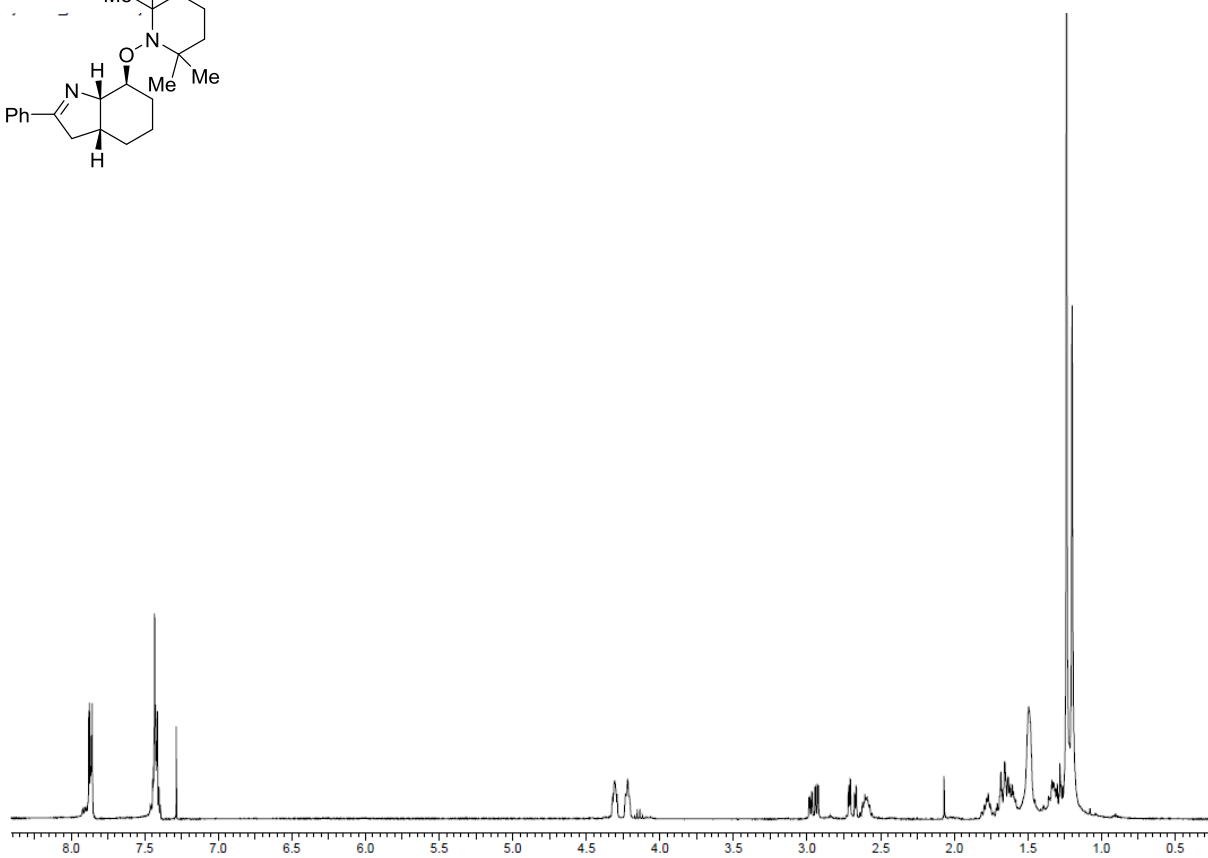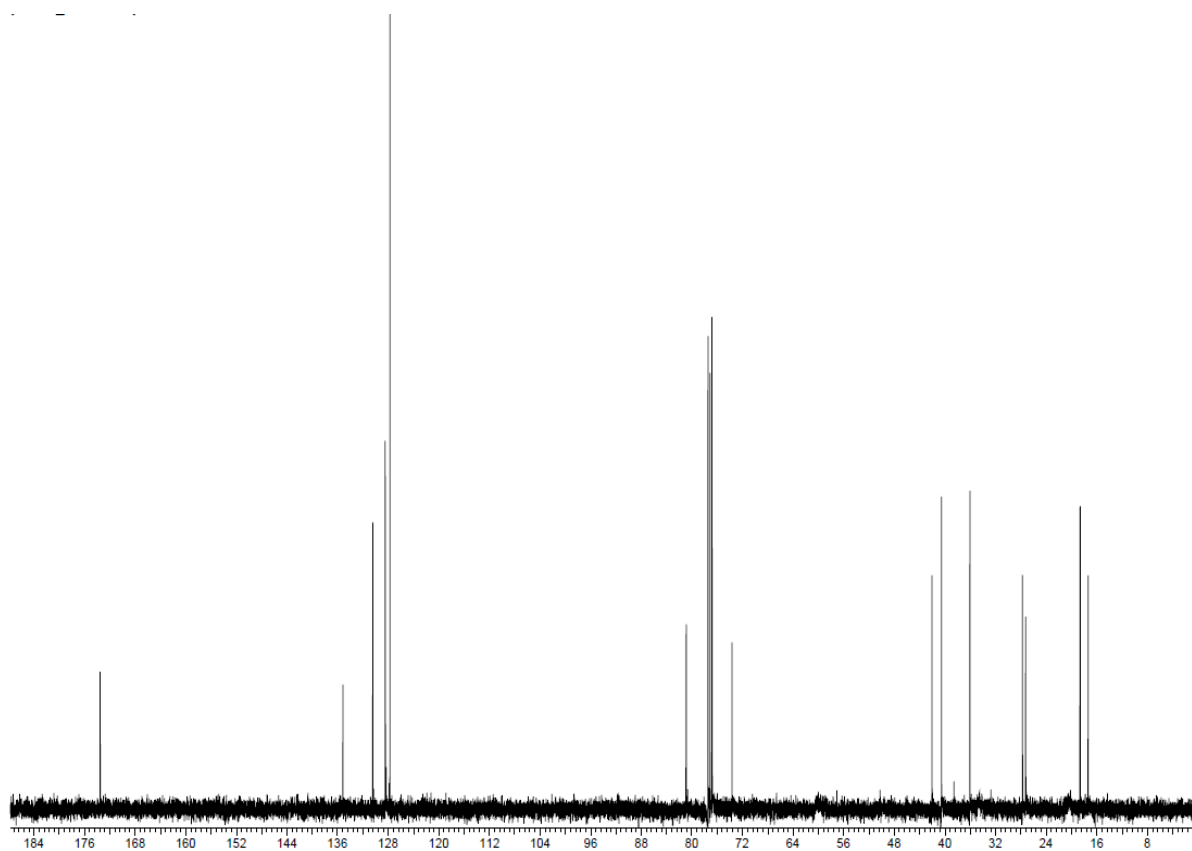

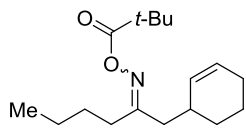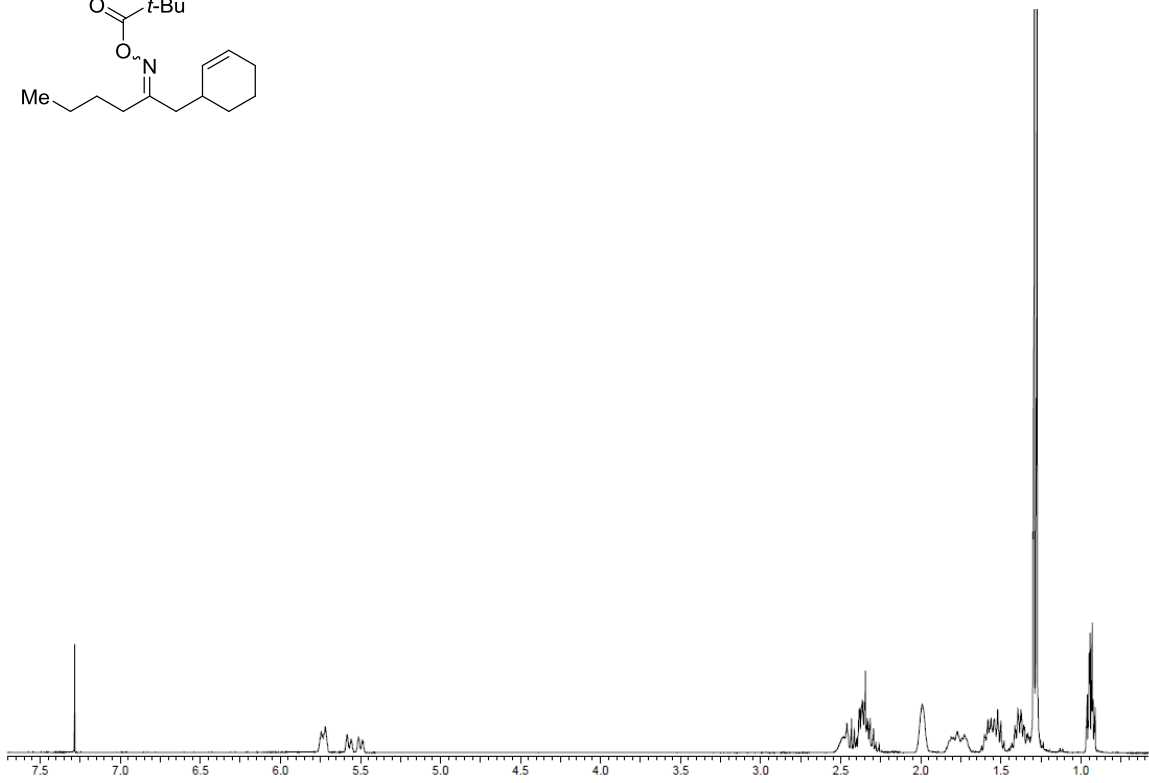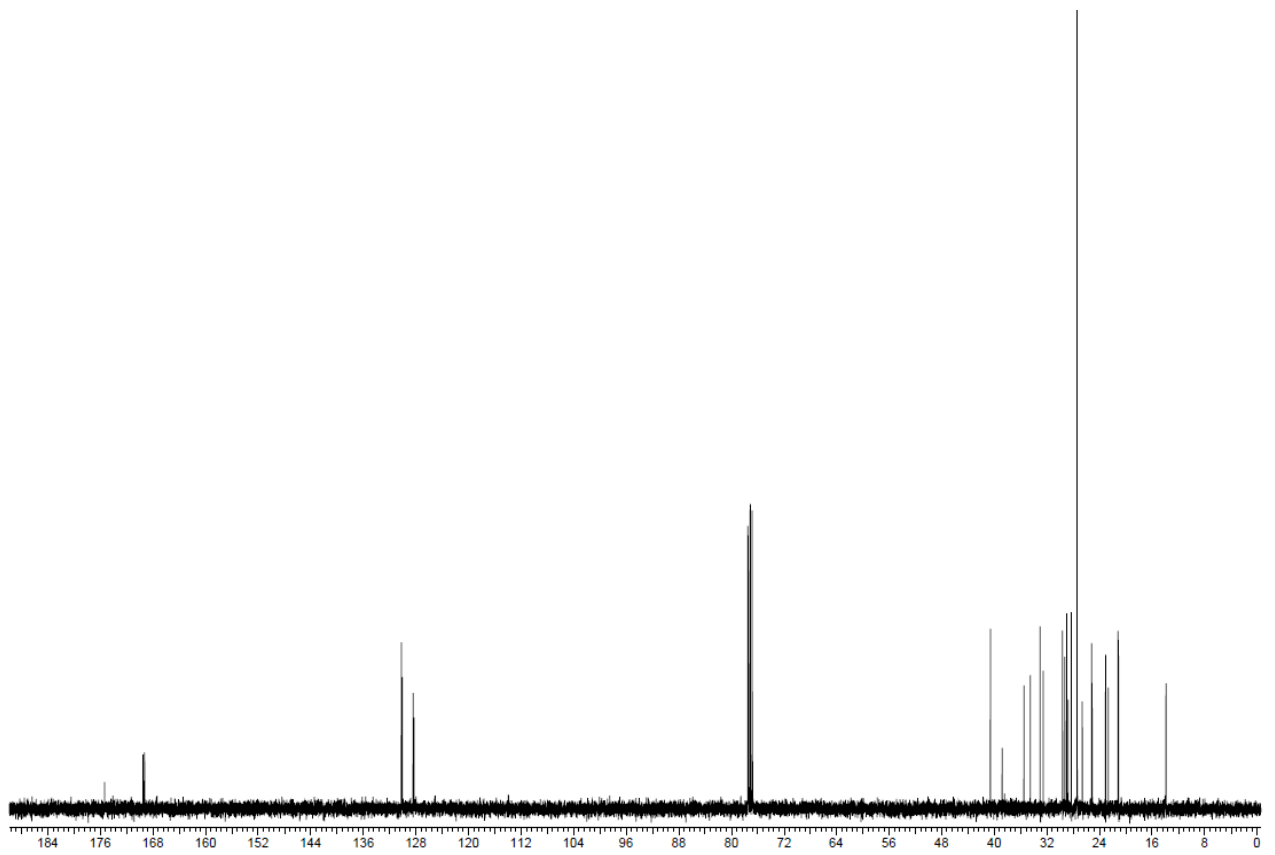



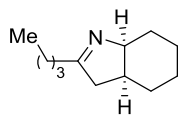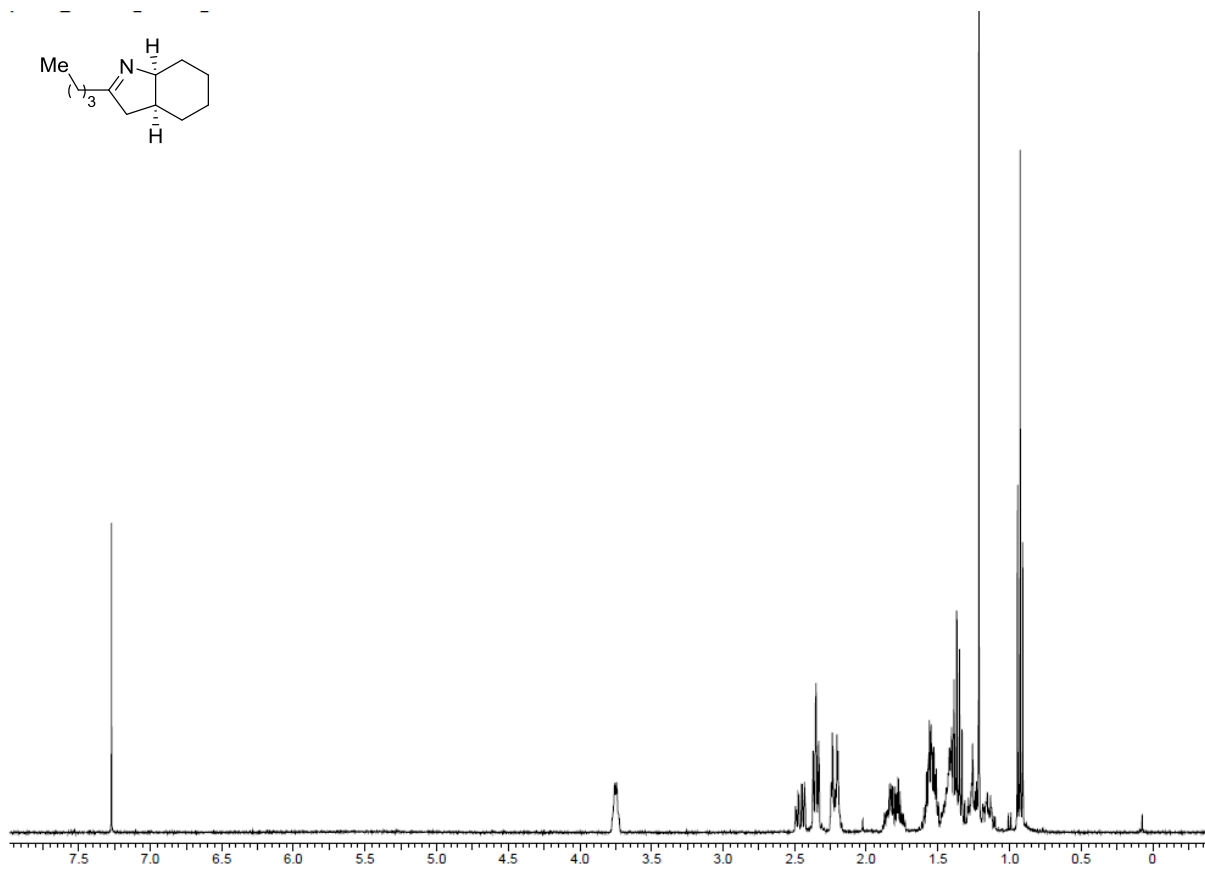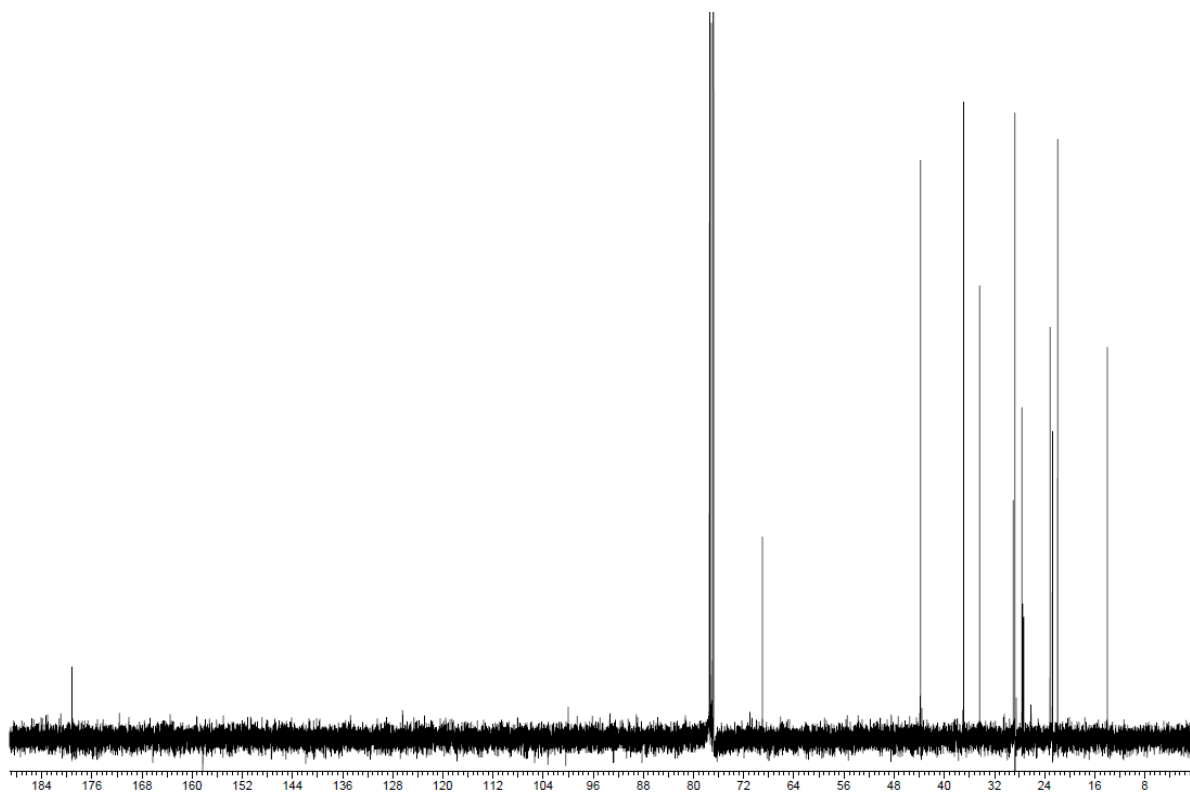

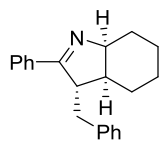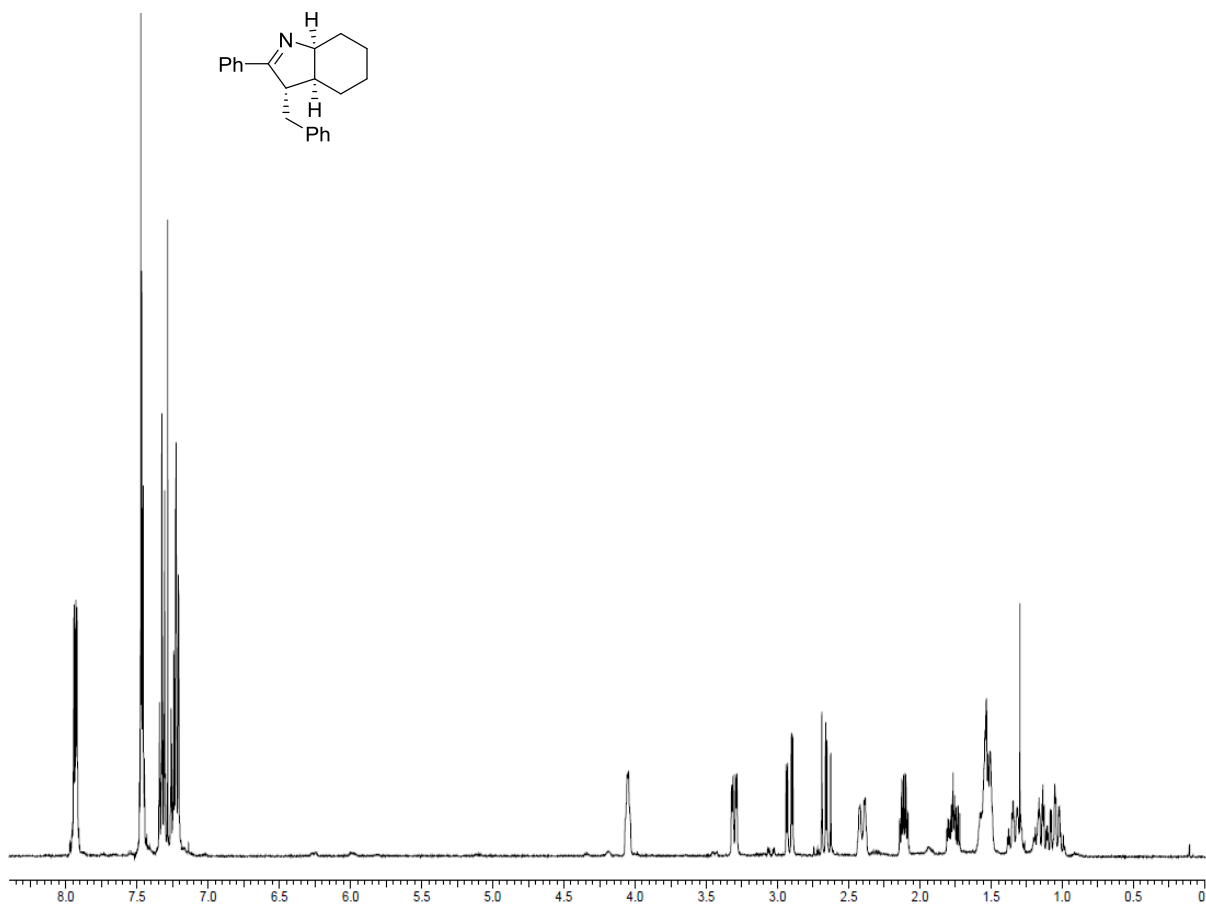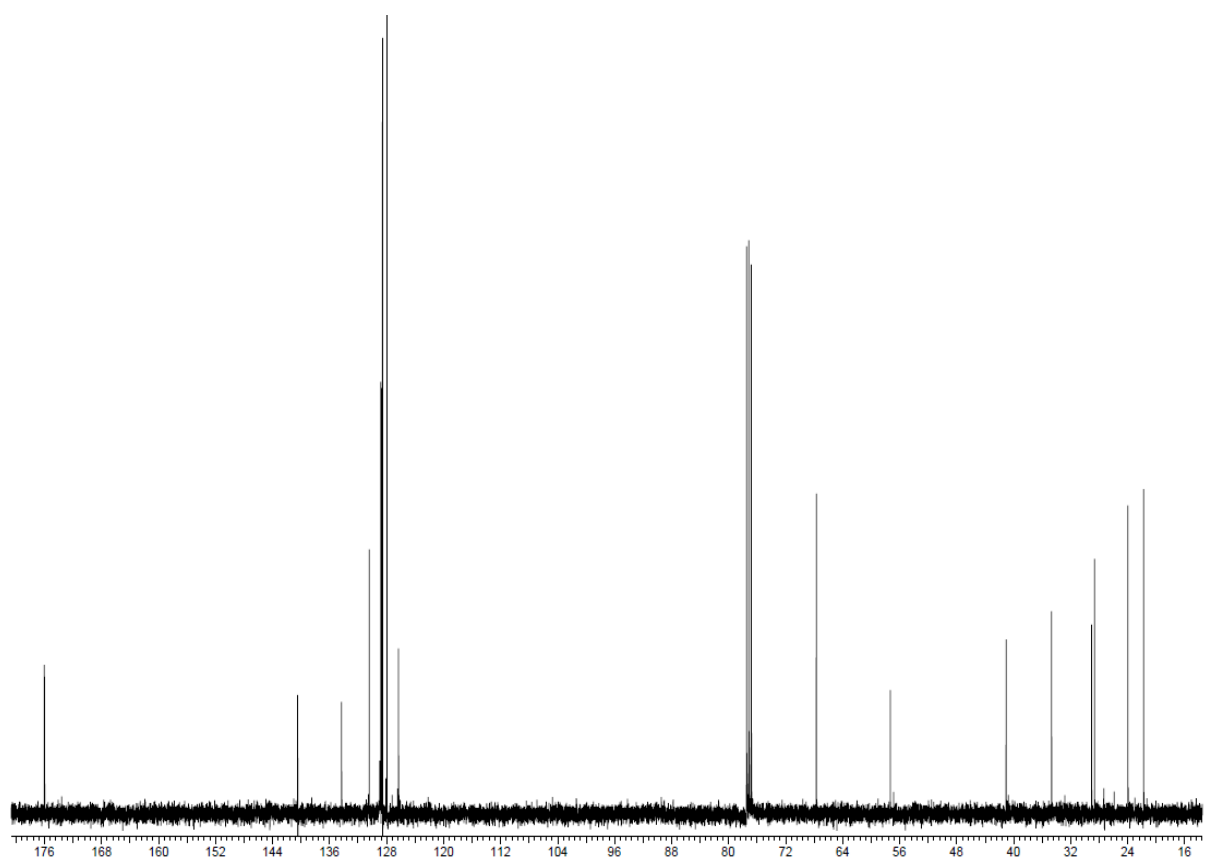

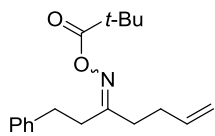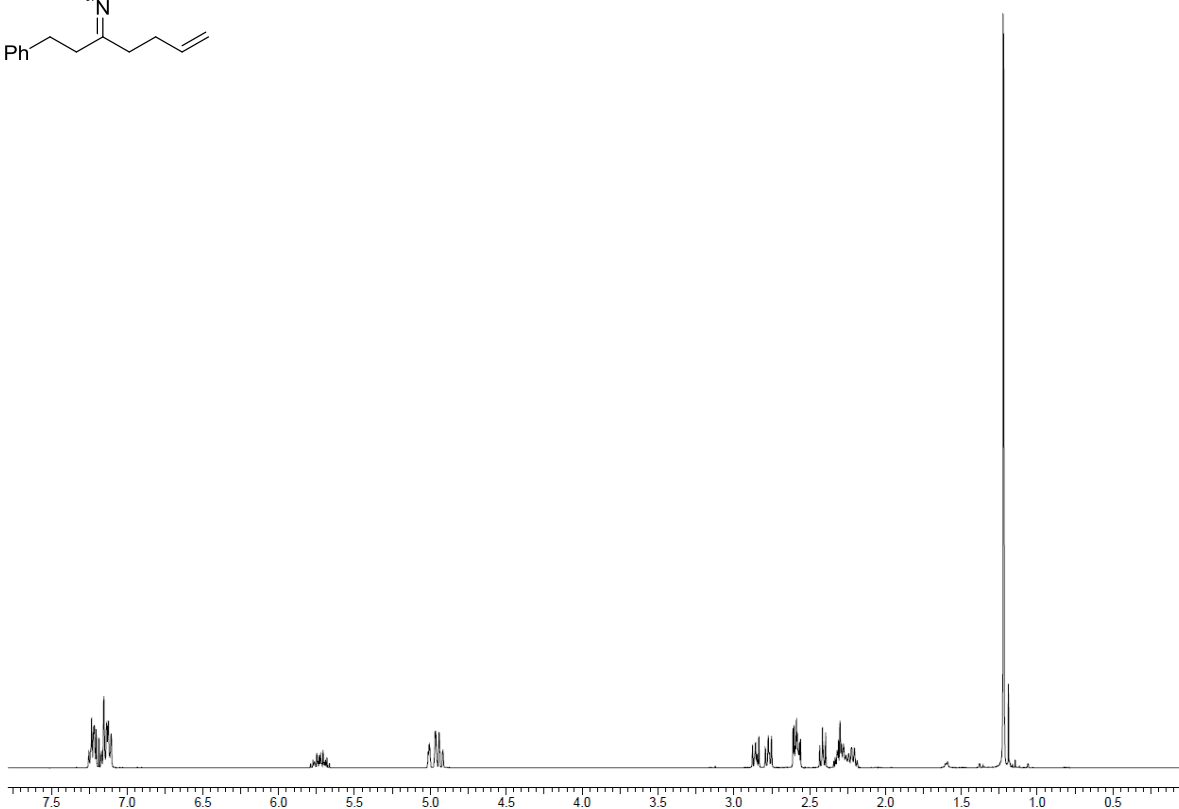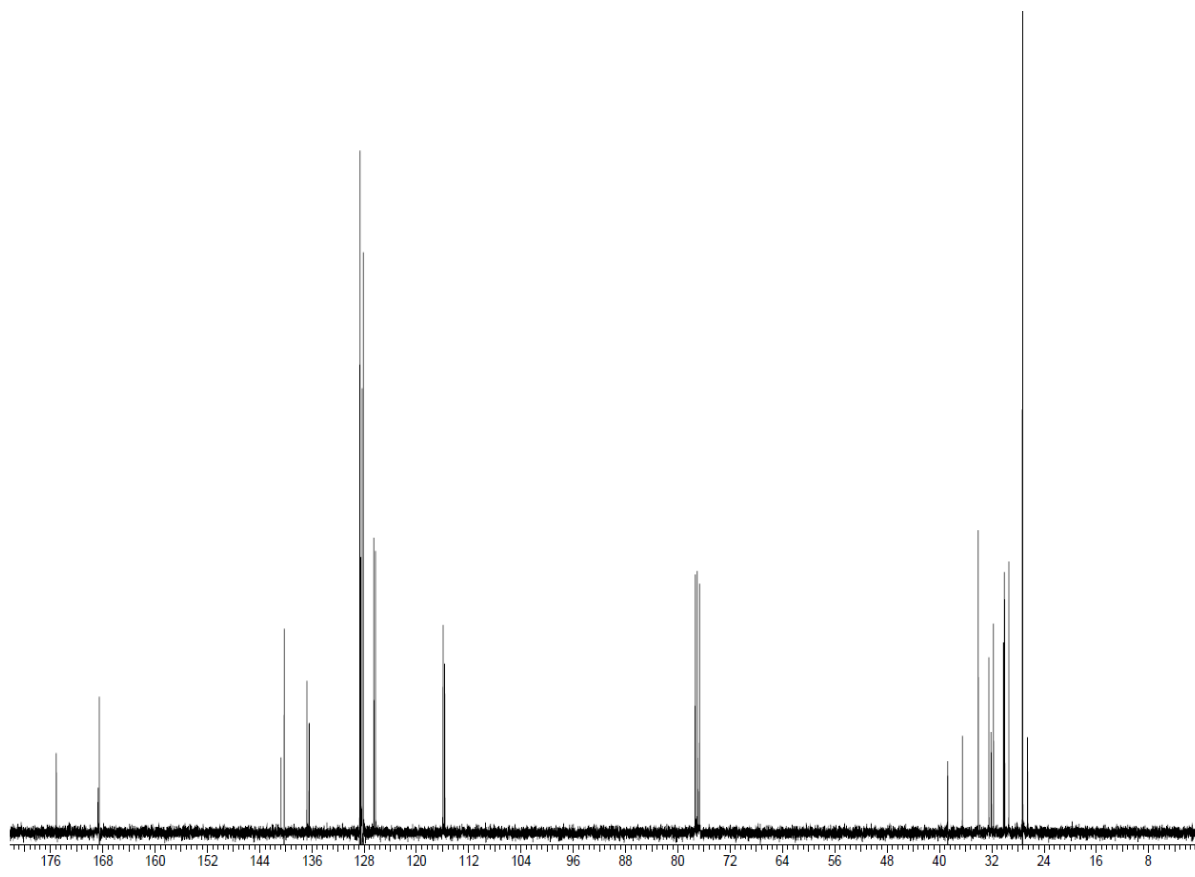

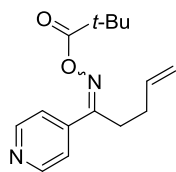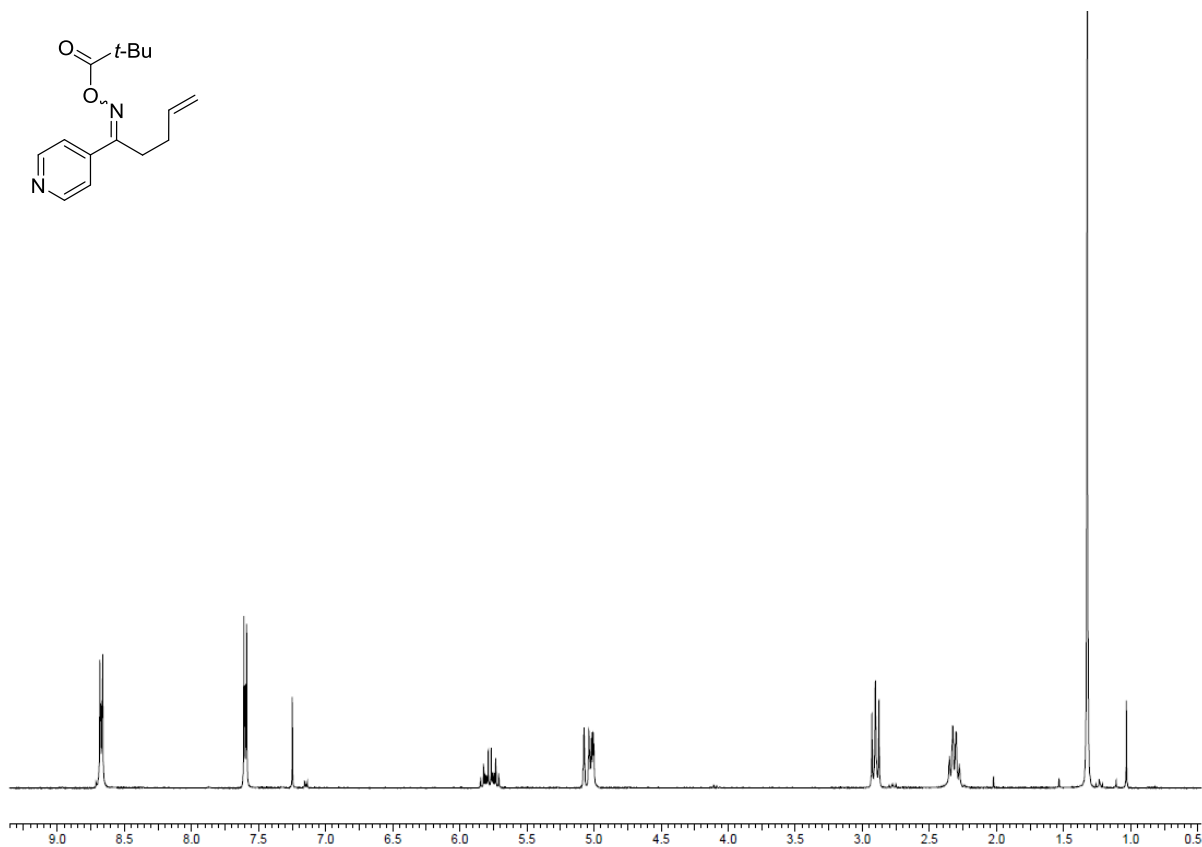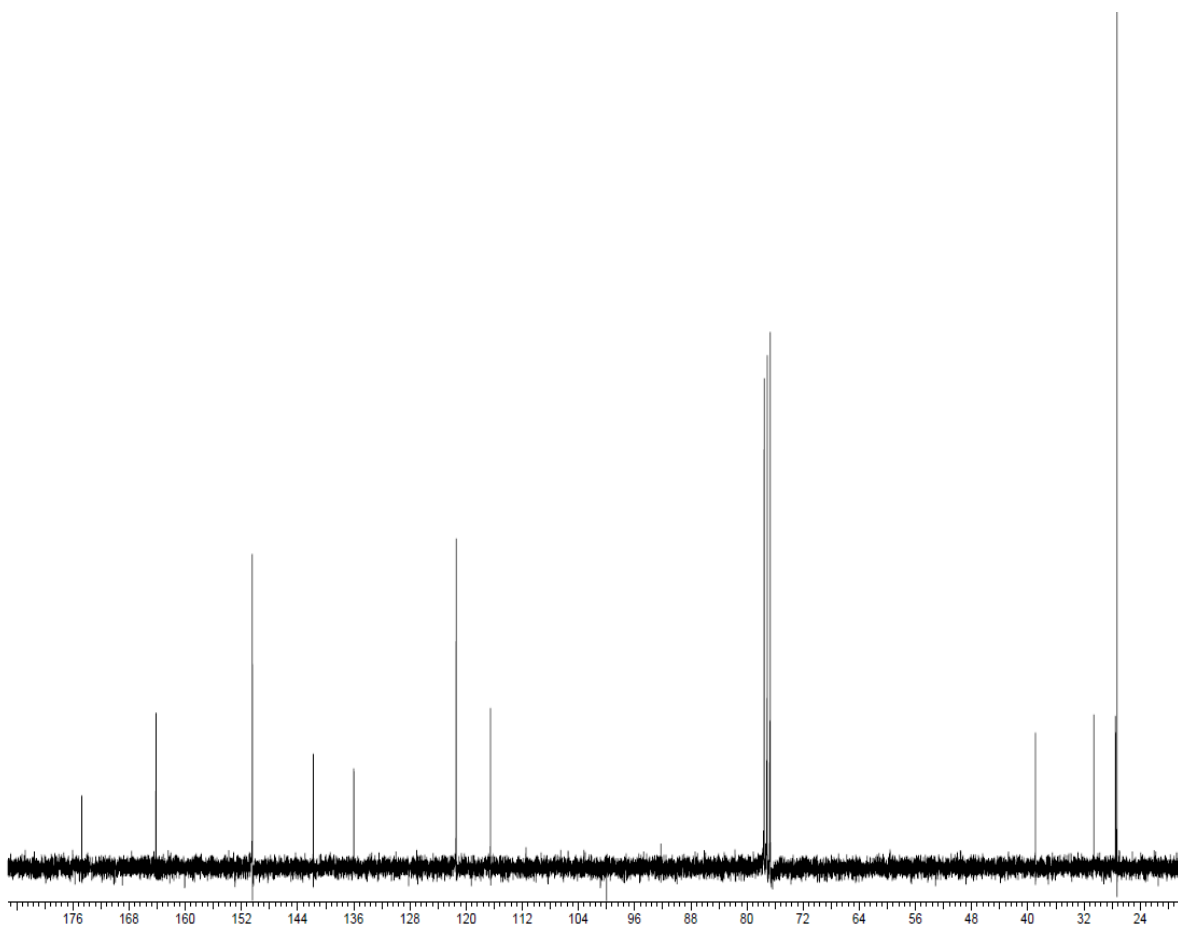

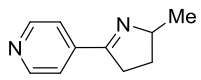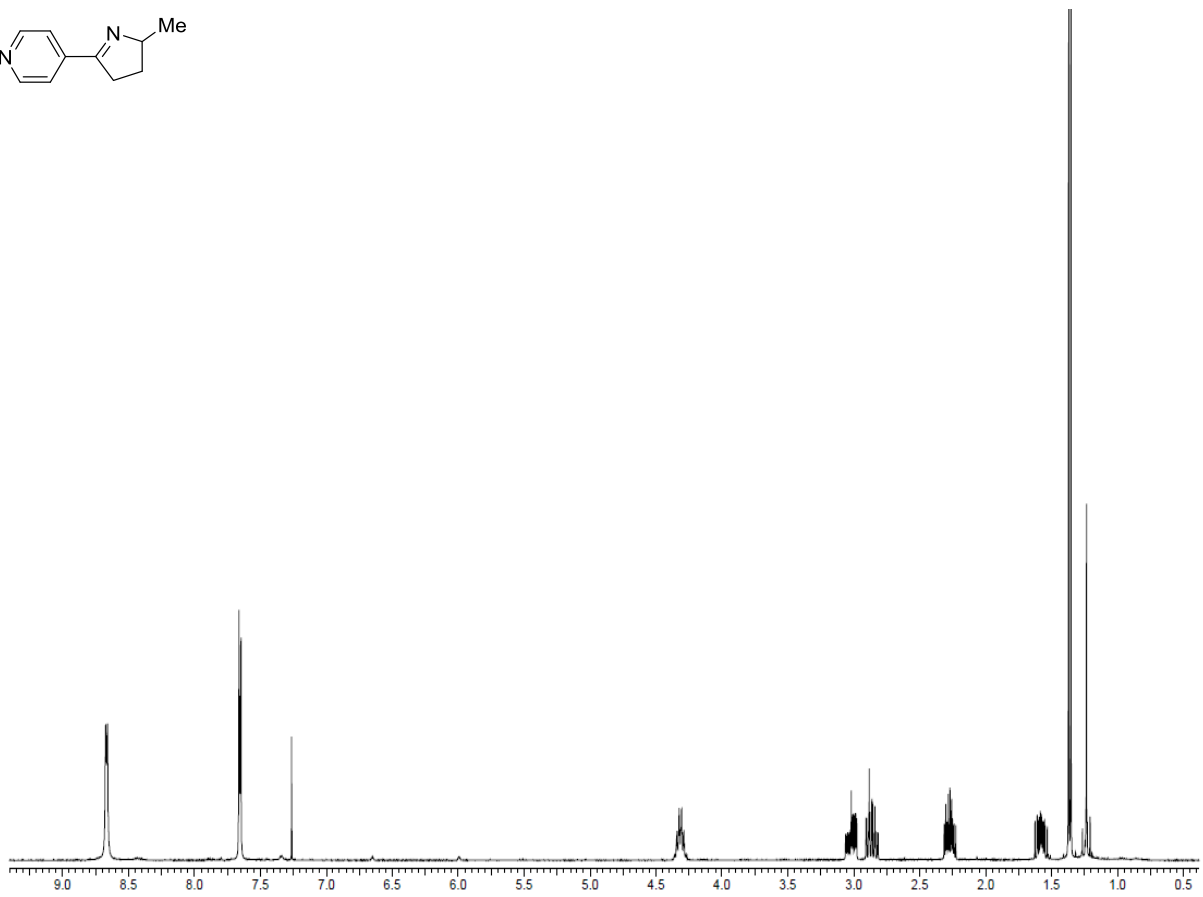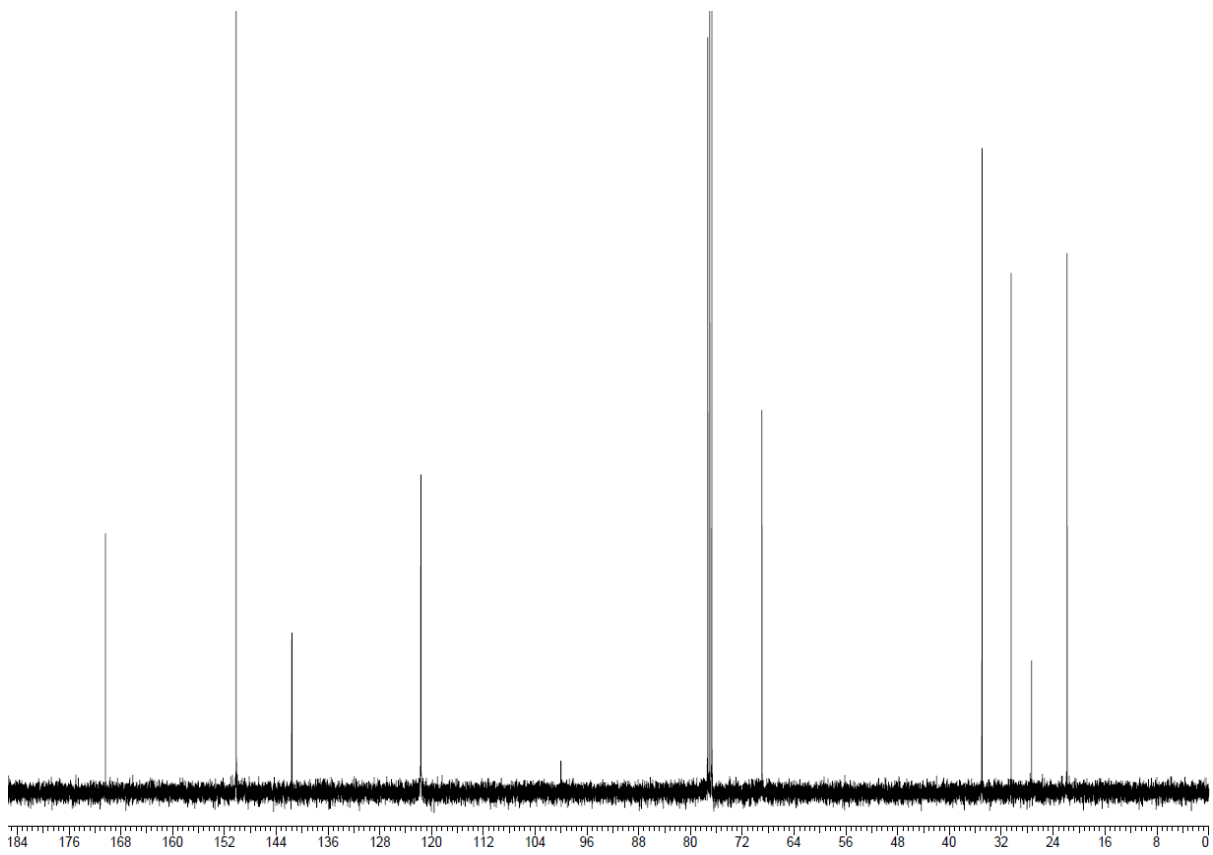

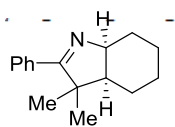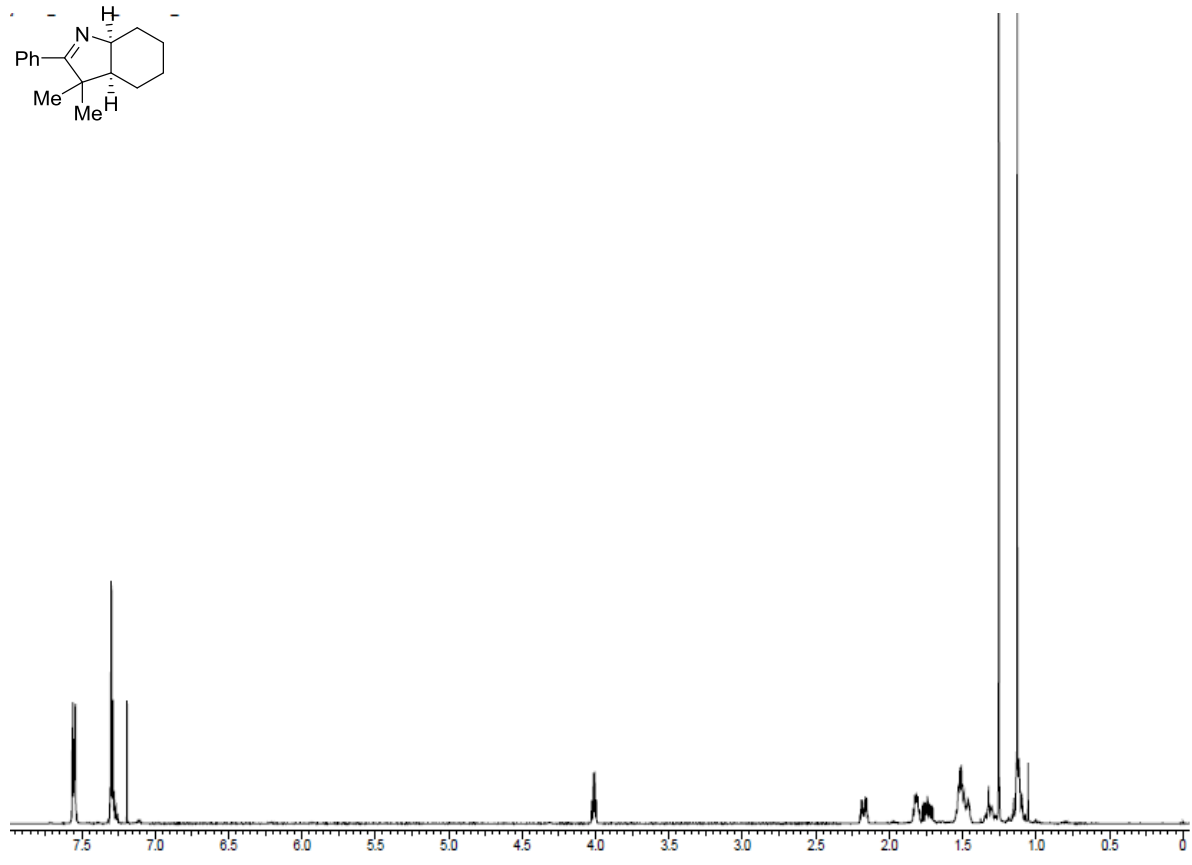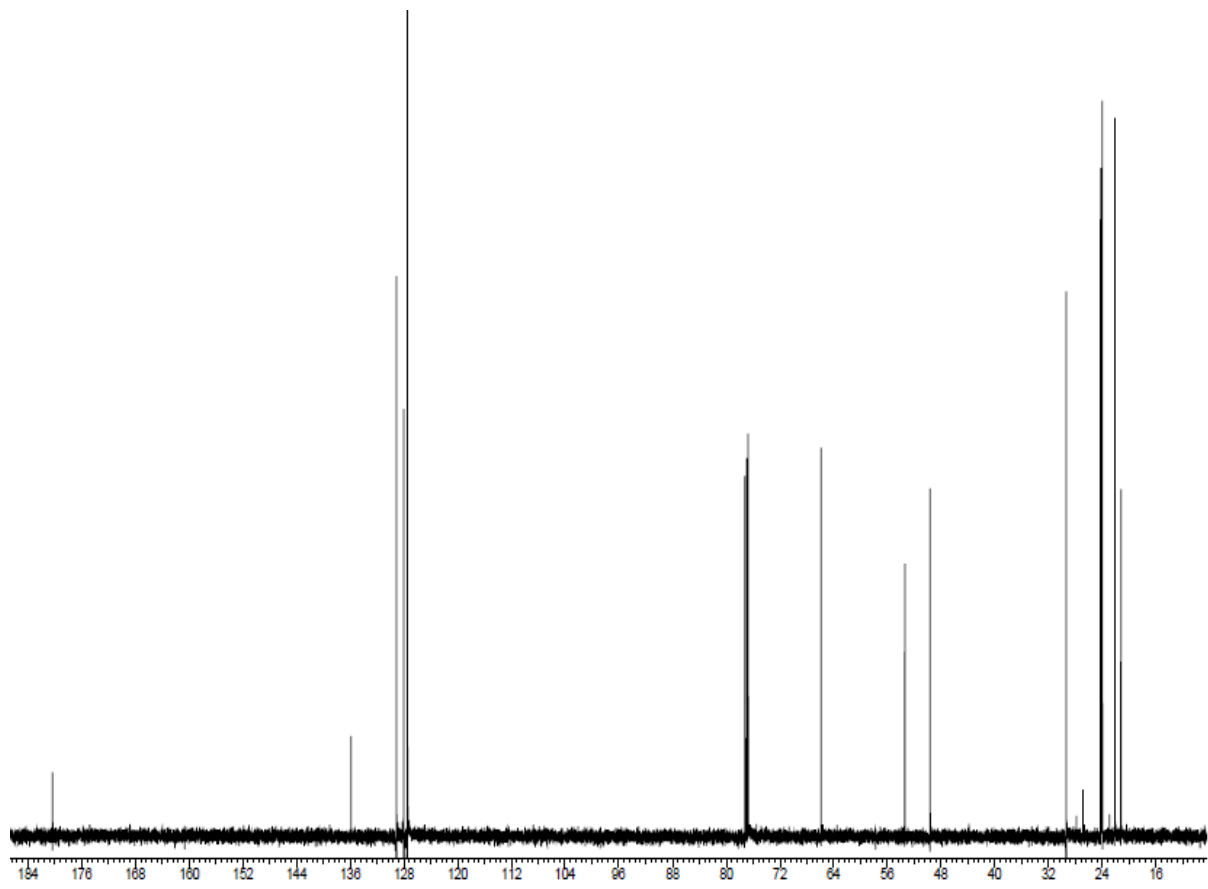

## References

- (1) Faulkner, A.; Bower, J. F. *Angew. Chem. Int. Ed.* **2012**, *51*, 1675.
- (2) Faulkner, A.; Race, N. J.; Bower, J. F. *Chem. Sci.* **2014**, *5*, 2416.
- (3) Rukachaisirikul, V.; Koert, U.; Reinhard, W. H. *Tetrahedron* **1992**, *48*, 4533.
- (4) Kitamura, M.; Yoshida, M.; Kikuchi, T.; Narasaka, K. *Synthesis* **2003**, 2415.
- (5) Uchiyama, K.; Hayashi, Y.; Narasaka, K. *Tetrahedron*, **1999**, *55*, 8915.
- (6) Zhu, J-L.; Su, Y-L.; Chan, Y-H.; Chen, I-C.; Liao, C-C. *Heterocycles*, **2009**, *78*, 369.
